# Supplementary material for: Harnessing consumer wearable digital biomarkers for individualized recognition of postpartum depression using the All of Us Research Program dataset
Source: bioRxiv or medRxiv preprint supplement (doi:10.1101/2023.10.13.23296965), 2023-10-14
Supplement: Supplementary file [file media-2.pdf]

Supplementary Table 7: OMOP concept IDs used in computational phenotyping of PPD and non-PPD cohorts.

| Name                                                                                                                                                                                                                | Concept Id | Variable                     | Variable class | Data source | Notes |
|---------------------------------------------------------------------------------------------------------------------------------------------------------------------------------------------------------------------|------------|------------------------------|----------------|-------------|-------|
| Delivery by cesarean section for footling breech presentation                                                                                                                                                       | 46273629   | Cesarean section             | Delivery       | Conditions  |       |
| Delivery by cesarean section for flexed breech presentation                                                                                                                                                         | 46273305   | Cesarean section             | Delivery       | Conditions  |       |
| Delivery by cesarean section for breech presentation                                                                                                                                                                | 46273304   | Cesarean section             | Delivery       | Conditions  |       |
| Emergency lower segment cesarean section with inverted T incision                                                                                                                                                   | 46270991   | Cesarean section             | Delivery       | Conditions  |       |
| Other specified other caesarean delivery                                                                                                                                                                            | 44513733   | Cesarean section             | Delivery       | Conditions  |       |
| Other specified elective caesarean delivery                                                                                                                                                                         | 44513729   | Cesarean section             | Delivery       | Conditions  |       |
| Cesarean section through J shaped incision of uterus                                                                                                                                                                | 42872493   | Cesarean section             | Delivery       | Conditions  |       |
| Cesarean section through inverted T shaped incision of uterus                                                                                                                                                       | 42872492   | Cesarean section             | Delivery       | Conditions  |       |
| Triplet liveborn in hospital by cesarean section                                                                                                                                                                    | 42539210   | Cesarean section             | Delivery       | Conditions  |       |
| Emergency lower segment cesarean section with bilateral tubal ligation                                                                                                                                              | 42537021   | Cesarean section             | Delivery       | Conditions  |       |
| Elective lower segment cesarean section with bilateral tubal ligation                                                                                                                                               | 42536960   | Cesarean section             | Delivery       | Conditions  |       |
| Emergency upper segment cesarean section with bilateral tubal ligation                                                                                                                                              | 42536954   | Cesarean section             | Delivery       | Conditions  |       |
| Elective upper segment cesarean section with bilateral tubal ligation                                                                                                                                               | 42536952   | Cesarean section             | Delivery       | Conditions  |       |
| Single liveborn born in hospital by cesarean section                                                                                                                                                                | 40483521   | Cesarean section             | Delivery       | Conditions  |       |
| Liveborn born in hospital by cesarean section                                                                                                                                                                       | 40483126   | Cesarean section             | Delivery       | Conditions  |       |
| Twin liveborn born in hospital by cesarean section                                                                                                                                                                  | 40483101   | Cesarean section             | Delivery       | Conditions  |       |
| Cesarean section w/o CC/MCC                                                                                                                                                                                         | 38001486   | Cesarean section             | Delivery       | Conditions  |       |
| Cesarean section w CC/MCC                                                                                                                                                                                           | 38001485   | Cesarean section             | Delivery       | Conditions  |       |
| Lower uterine segment cesarean section                                                                                                                                                                              | 37312440   | Cesarean section             | Delivery       | Conditions  |       |
| Preterm delivery following Cesarean section                                                                                                                                                                         | 37110284   | Cesarean section             | Delivery       | Conditions  |       |
| Born by emergency cesarean section                                                                                                                                                                                  | 4250010    | Cesarean section             | Delivery       | Conditions  |       |
| Vaginal cesarean section                                                                                                                                                                                            | 4228344    | Cesarean section             | Delivery       | Conditions  |       |
| Classical cesarean section                                                                                                                                                                                          | 4223536    | Cesarean section             | Delivery       | Conditions  |       |
| Born by elective cesarean section                                                                                                                                                                                   | 4212794    | Cesarean section             | Delivery       | Conditions  |       |
| Extraperitoneal cesarean section                                                                                                                                                                                    | 4211824    | Cesarean section             | Delivery       | Conditions  |       |
| Born by cesarean section                                                                                                                                                                                            | 4192676    | Cesarean section             | Delivery       | Conditions  |       |
| Placenta previa found before labor AND delivery by cesarean section without hemorrhage                                                                                                                              | 4172142    | Cesarean section             | Delivery       | Conditions  |       |
| Anesthesia for cesarean section                                                                                                                                                                                     | 4171820    | Cesarean section             | Delivery       | Conditions  |       |
| Emergency cesarean section                                                                                                                                                                                          | 4167089    | Cesarean section             | Delivery       | Conditions  |       |
| Abdominal delivery for shoulder dystocia                                                                                                                                                                            | 4130321    | Cesarean section             | Delivery       | Conditions  |       |
| Emergency lower segment cesarean section                                                                                                                                                                            | 4127252    | Cesarean section             | Delivery       | Conditions  |       |
| Delivered by cesarean delivery following previous cesarean delivery                                                                                                                                                 | 4119336    | Cesarean section             | Delivery       | Conditions  |       |
| Delivered by cesarean section - pregnancy at term                                                                                                                                                                   | 4118802    | Cesarean section             | Delivery       | Conditions  |       |
| Elective cesarean section                                                                                                                                                                                           | 4075182    | Cesarean section             | Delivery       | Conditions  |       |
| Elective lower segment cesarean section                                                                                                                                                                             | 4075161    | Cesarean section             | Delivery       | Conditions  |       |
| Elective upper segment cesarean section                                                                                                                                                                             | 4075160    | Cesarean section             | Delivery       | Conditions  |       |
| Delivery by emergency cesarean section                                                                                                                                                                              | 4066112    | Cesarean section             | Delivery       | Conditions  |       |
| Cesarean section - pregnancy at term                                                                                                                                                                                | 4066111    | Cesarean section             | Delivery       | Conditions  |       |
| Cesarean section following previous cesarean section                                                                                                                                                                | 4065739    | Cesarean section             | Delivery       | Conditions  |       |
| Multiple delivery, all by cesarean section                                                                                                                                                                          | 4063163    | Cesarean section             | Delivery       | Conditions  |       |
| Delivery by elective cesarean section                                                                                                                                                                               | 4061457    | Cesarean section             | Delivery       | Conditions  |       |
| Emergency upper segment cesarean section                                                                                                                                                                            | 4032767    | Cesarean section             | Delivery       | Conditions  |       |
| Cesarean section                                                                                                                                                                                                    | 4015701    | Cesarean section             | Delivery       | Conditions  |       |
| Cesarean delivery only, following attempted vaginal delivery after previous cesarean delivery; including postpartum care                                                                                            | 2110324    | Cesarean section             | Delivery       | Conditions  |       |
| Cesarean delivery only, following attempted vaginal delivery after previous cesarean delivery                                                                                                                       | 2110323    | Cesarean section             | Delivery       | Conditions  |       |
| Cesarean delivery only; including postpartum care                                                                                                                                                                   | 2110317    | Cesarean section             | Delivery       | Conditions  |       |
| Cesarean delivery only                                                                                                                                                                                              | 2110316    | Cesarean section             | Delivery       | Conditions  |       |
| Anesthesia for cesarean delivery following neuraxial labor analgesia/anesthesia (List separately in addition to code for primary procedure performed)                                                               | 2101814    | Cesarean section             | Delivery       | Conditions  |       |
| Anesthesia for cesarean delivery only                                                                                                                                                                               | 2101807    | Cesarean section             | Delivery       | Conditions  |       |
| Neuraxial analgesia/anesthesia for labor ending in a cesarean delivery (includes any repeat subarachnoid needle placement and drug injection and/or any necessary replacement of an epidural catheter during labor) | 2101016    | Cesarean section             | Delivery       | Conditions  |       |
| Anesthesia for intraperitoneal procedures in lower abdomen including laparoscopy; cesarean section                                                                                                                  | 2101013    | Cesarean section             | Delivery       | Conditions  |       |
| Other cesarean section of unspecified type                                                                                                                                                                          | 2004802    | Cesarean section             | Delivery       | Conditions  |       |
| Cesarean section of other specified type                                                                                                                                                                            | 2004789    | Cesarean section             | Delivery       | Conditions  |       |
| Low cervical cesarean section                                                                                                                                                                                       | 2004786    | Cesarean section             | Delivery       | Conditions  |       |
| Cesarean delivery - delivered                                                                                                                                                                                       | 437942     | Cesarean section             | Delivery       | Conditions  |       |
| Deliveries by cesarean                                                                                                                                                                                              | 193277     | Cesarean section             | Delivery       | Conditions  |       |
| Delivery by cesarean section for footling breech presentation                                                                                                                                                       | 46273629   | Delivery record only (DELIV) | Delivery       | Conditions  |       |
| Delivery by cesarean section for flexed breech presentation                                                                                                                                                         | 46273305   | Delivery record only (DELIV) | Delivery       | Conditions  |       |
| Delivery by cesarean section for breech presentation                                                                                                                                                                | 46273304   | Delivery record only (DELIV) | Delivery       | Conditions  |       |
| Vacuum assisted vaginal delivery                                                                                                                                                                                    | 45757174   | Delivery record only (DELIV) | Delivery       | Conditions  |       |
| Other specified cephalic vaginal delivery with abnormal presentation of head at delivery without instrument                                                                                                         | 44513756   | Delivery record only (DELIV) | Delivery       | Conditions  |       |
| Other specified vacuum delivery                                                                                                                                                                                     | 44513752   | Delivery record only (DELIV) | Delivery       | Conditions  |       |
| Other specified forceps cephalic delivery                                                                                                                                                                           | 44513747   | Delivery record only (DELIV) | Delivery       | Conditions  |       |

|                                                         |          |                              |          |            |  |
|---------------------------------------------------------|----------|------------------------------|----------|------------|--|
| Low forceps cephalic delivery                           | 44513746 | Delivery record only (DELIV) | Delivery | Conditions |  |
| Mid forceps cephalic delivery NEC                       | 44513745 | Delivery record only (DELIV) | Delivery | Conditions |  |
| High forceps cephalic delivery NEC                      | 44513743 | Delivery record only (DELIV) | Delivery | Conditions |  |
| Other specified other breech delivery                   | 44513740 | Delivery record only (DELIV) | Delivery | Conditions |  |
| Other specified breech extraction delivery              | 44513736 | Delivery record only (DELIV) | Delivery | Conditions |  |
| Multiple liveborn in hospital by vaginal delivery       | 42539267 | Delivery record only (DELIV) | Delivery | Conditions |  |
| Mid vacuum delivery                                     | 42535817 | Delivery record only (DELIV) | Delivery | Conditions |  |
| Outlet vacuum delivery                                  | 42535816 | Delivery record only (DELIV) | Delivery | Conditions |  |
| Born by mid-cavity forceps delivery                     | 37310404 | Delivery record only (DELIV) | Delivery | Conditions |  |
| Born by low forceps delivery                            | 37310393 | Delivery record only (DELIV) | Delivery | Conditions |  |
| Born by high forceps delivery                           | 37310369 | Delivery record only (DELIV) | Delivery | Conditions |  |
| Single liveborn born in hospital by vaginal delivery    | 36713074 | Delivery record only (DELIV) | Delivery | Conditions |  |
| Vaginal delivery, medical personnel present             | 4331179  | Delivery record only (DELIV) | Delivery | Conditions |  |
| Forceps delivery with rotation of fetal head            | 4324549  | Delivery record only (DELIV) | Delivery | Conditions |  |
| Pinard maneuver                                         | 4294827  | Delivery record only (DELIV) | Delivery | Conditions |  |
| Trial forceps delivery                                  | 4290245  | Delivery record only (DELIV) | Delivery | Conditions |  |
| Mid forceps delivery                                    | 4266683  | Delivery record only (DELIV) | Delivery | Conditions |  |
| Kristeller maneuver                                     | 4250441  | Delivery record only (DELIV) | Delivery | Conditions |  |
| Born by breech delivery                                 | 4250009  | Delivery record only (DELIV) | Delivery | Conditions |  |
| Frank breech delivery                                   | 4244672  | Delivery record only (DELIV) | Delivery | Conditions |  |
| Bracht maneuver                                         | 4240325  | Delivery record only (DELIV) | Delivery | Conditions |  |
| Delivery by Malstrom's extraction                       | 4234710  | Delivery record only (DELIV) | Delivery | Conditions |  |
| Partial breech delivery                                 | 4234421  | Delivery record only (DELIV) | Delivery | Conditions |  |
| Delivery by Kielland rotation                           | 4232028  | Delivery record only (DELIV) | Delivery | Conditions |  |
| High forceps delivery                                   | 4231702  | Delivery record only (DELIV) | Delivery | Conditions |  |
| Partial breech extraction                               | 4230533  | Delivery record only (DELIV) | Delivery | Conditions |  |
| Delivery by Malstrom's extraction with episiotomy       | 4223638  | Delivery record only (DELIV) | Delivery | Conditions |  |
| Footling breech delivery                                | 4217642  | Delivery record only (DELIV) | Delivery | Conditions |  |
| Born by forceps delivery                                | 4217586  | Delivery record only (DELIV) | Delivery | Conditions |  |
| Breech extraction                                       | 4213387  | Delivery record only (DELIV) | Delivery | Conditions |  |
| Spontaneous vertex delivery                             | 4205240  | Delivery record only (DELIV) | Delivery | Conditions |  |
| Total breech delivery with forceps to aftercoming head  | 4204679  | Delivery record only (DELIV) | Delivery | Conditions |  |
| Delivery by vacuum extraction                           | 4189205  | Delivery record only (DELIV) | Delivery | Conditions |  |
| Premature pregnancy delivered                           | 4175637  | Delivery record only (DELIV) | Delivery | Conditions |  |
| Neville-Barnes forceps delivery                         | 4173513  | Delivery record only (DELIV) | Delivery | Conditions |  |
| Abnormal delivery                                       | 4170626  | Delivery record only (DELIV) | Delivery | Conditions |  |
| Simpson's forceps delivery                              | 4170152  | Delivery record only (DELIV) | Delivery | Conditions |  |
| Vaginal delivery with forceps including postpartum care | 4167018  | Delivery record only (DELIV) | Delivery | Conditions |  |
| Brow delivery                                           | 4166775  | Delivery record only (DELIV) | Delivery | Conditions |  |
| Total breech extraction                                 | 4166247  | Delivery record only (DELIV) | Delivery | Conditions |  |
| Face delivery                                           | 4164221  | Delivery record only (DELIV) | Delivery | Conditions |  |
| Delivered by low forceps delivery                       | 4156948  | Delivery record only (DELIV) | Delivery | Conditions |  |
| Deliveries by spontaneous breech delivery               | 4154615  | Delivery record only (DELIV) | Delivery | Conditions |  |
| Delivered by mid-cavity forceps delivery                | 4153284  | Delivery record only (DELIV) | Delivery | Conditions |  |
| Barton's forceps delivery                               | 4147974  | Delivery record only (DELIV) | Delivery | Conditions |  |
| Midforceps delivery without rotation                    | 4143647  | Delivery record only (DELIV) | Delivery | Conditions |  |
| Breech presentation, no version                         | 4137400  | Delivery record only (DELIV) | Delivery | Conditions |  |
| Delivery of the after coming head                       | 4130319  | Delivery record only (DELIV) | Delivery | Conditions |  |
| Instrumental delivery                                   | 4128031  | Delivery record only (DELIV) | Delivery | Conditions |  |
| Term pregnancy delivered                                | 4127705  | Delivery record only (DELIV) | Delivery | Conditions |  |
| Mauriceau Smellie Veit maneuver                         | 4127251  | Delivery record only (DELIV) | Delivery | Conditions |  |
| Lovset's maneuver                                       | 4127250  | Delivery record only (DELIV) | Delivery | Conditions |  |
| Outlet forceps delivery                                 | 4127249  | Delivery record only (DELIV) | Delivery | Conditions |  |
| Nonrotational forceps delivery                          | 4127248  | Delivery record only (DELIV) | Delivery | Conditions |  |
| Born after precipitate delivery                         | 4119050  | Delivery record only (DELIV) | Delivery | Conditions |  |
| Abnormal head presentation delivery                     | 4118904  | Delivery record only (DELIV) | Delivery | Conditions |  |
| Normal delivery - occipitoanterior                      | 4118903  | Delivery record only (DELIV) | Delivery | Conditions |  |
| Forceps delivery                                        | 4114637  | Delivery record only (DELIV) | Delivery | Conditions |  |
| Breech extraction with internal podalic version         | 4114636  | Delivery record only (DELIV) | Delivery | Conditions |  |
| Delivery by double application of forceps               | 4106406  | Delivery record only (DELIV) | Delivery | Conditions |  |
| Prague maneuver                                         | 4103850  | Delivery record only (DELIV) | Delivery | Conditions |  |
| Wigand-Martin maneuver                                  | 4102595  | Delivery record only (DELIV) | Delivery | Conditions |  |
| Delivery by Scanzoni maneuver                           | 4100410  | Delivery record only (DELIV) | Delivery | Conditions |  |
| Delivery by vacuum extraction with episiotomy           | 4096145  | Delivery record only (DELIV) | Delivery | Conditions |  |
| Mid forceps delivery with episiotomy                    | 4093774  | Delivery record only (DELIV) | Delivery | Conditions |  |
| Low forceps delivery                                    | 4088084  | Delivery record only (DELIV) | Delivery | Conditions |  |
| Face to pubes birth                                     | 4083524  | Delivery record only (DELIV) | Delivery | Conditions |  |
| Low forceps delivery with episiotomy                    | 4075735  | Delivery record only (DELIV) | Delivery | Conditions |  |
| Low vacuum delivery                                     | 4075191  | Delivery record only (DELIV) | Delivery | Conditions |  |
| DeLee forceps cephalic delivery with rotation           | 4075190  | Delivery record only (DELIV) | Delivery | Conditions |  |
| Midforceps cephalic delivery with rotation              | 4075189  | Delivery record only (DELIV) | Delivery | Conditions |  |
| High forceps cephalic delivery with rotation            | 4075188  | Delivery record only (DELIV) | Delivery | Conditions |  |

|                                                                                                                                                                       |          |                              |          |            |  |
|-----------------------------------------------------------------------------------------------------------------------------------------------------------------------|----------|------------------------------|----------|------------|--|
| Forceps cephalic delivery                                                                                                                                             | 4075187  | Delivery record only (DELIV) | Delivery | Conditions |  |
| Vacuum delivery before full dilation of cervix                                                                                                                        | 4075171  | Delivery record only (DELIV) | Delivery | Conditions |  |
| High vacuum delivery                                                                                                                                                  | 4075170  | Delivery record only (DELIV) | Delivery | Conditions |  |
| Barton forceps cephalic delivery with rotation                                                                                                                        | 4075169  | Delivery record only (DELIV) | Delivery | Conditions |  |
| Assisted breech delivery                                                                                                                                              | 4075168  | Delivery record only (DELIV) | Delivery | Conditions |  |
| Breech extraction delivery with version                                                                                                                               | 4075165  | Delivery record only (DELIV) | Delivery | Conditions |  |
| Piper forceps delivery                                                                                                                                                | 4073438  | Delivery record only (DELIV) | Delivery | Conditions |  |
| Trial of vacuum delivery                                                                                                                                              | 4073424  | Delivery record only (DELIV) | Delivery | Conditions |  |
| Spontaneous breech delivery                                                                                                                                           | 4073422  | Delivery record only (DELIV) | Delivery | Conditions |  |
| Non-manipulative cephalic vaginal delivery with abnormal presentation of head at delivery without instrument                                                          | 4071630  | Delivery record only (DELIV) | Delivery | Conditions |  |
| Deliveries by destructive operation                                                                                                                                   | 4066113  | Delivery record only (DELIV) | Delivery | Conditions |  |
| Delivery by combination of forceps and vacuum extractor                                                                                                               | 4065737  | Delivery record only (DELIV) | Delivery | Conditions |  |
| Piper forceps delivery by application to aftercoming head                                                                                                             | 4064824  | Delivery record only (DELIV) | Delivery | Conditions |  |
| Multiple delivery, all by forceps and vacuum extractor                                                                                                                | 4063162  | Delivery record only (DELIV) | Delivery | Conditions |  |
| Normal delivery but ante- or post- natal conditions present                                                                                                           | 4063160  | Delivery record only (DELIV) | Delivery | Conditions |  |
| Delivered by mid-cavity forceps with rotation                                                                                                                         | 4062136  | Delivery record only (DELIV) | Delivery | Conditions |  |
| High forceps delivery with episiotomy                                                                                                                                 | 4035778  | Delivery record only (DELIV) | Delivery | Conditions |  |
| Complete breech delivery                                                                                                                                              | 4034145  | Delivery record only (DELIV) | Delivery | Conditions |  |
| Burns Marshall maneuver                                                                                                                                               | 4032766  | Delivery record only (DELIV) | Delivery | Conditions |  |
| Groin traction at breech delivery                                                                                                                                     | 4032764  | Delivery record only (DELIV) | Delivery | Conditions |  |
| Forceps application to aftercoming head                                                                                                                               | 4032762  | Delivery record only (DELIV) | Delivery | Conditions |  |
| Forceps delivery, face to pubes                                                                                                                                       | 4032761  | Delivery record only (DELIV) | Delivery | Conditions |  |
| Partial breech delivery with forceps to aftercoming head                                                                                                              | 4023797  | Delivery record only (DELIV) | Delivery | Conditions |  |
| Normal birth                                                                                                                                                          | 4014720  | Delivery record only (DELIV) | Delivery | Conditions |  |
| Postmature pregnancy delivered                                                                                                                                        | 4011047  | Delivery record only (DELIV) | Delivery | Conditions |  |
| Threatened premature labor - delivered                                                                                                                                | 3186670  | Delivery record only (DELIV) | Delivery | Conditions |  |
| Vaginal delivery only, after previous cesarean delivery (with or without episiotomy and/or forceps); including postpartum care                                        | 2110321  | Delivery record only (DELIV) | Delivery | Conditions |  |
| Routine obstetric care including antepartum care, vaginal delivery (with or without episiotomy, and/or forceps) and postpartum care, after previous cesarean delivery | 2110319  | Delivery record only (DELIV) | Delivery | Conditions |  |
| Vaginal delivery only (with or without episiotomy and/or forceps); including postpartum care                                                                          | 2110309  | Delivery record only (DELIV) | Delivery | Conditions |  |
| Vaginal delivery only (with or without episiotomy and/or forceps)                                                                                                     | 2110308  | Delivery record only (DELIV) | Delivery | Conditions |  |
| Routine obstetric care including antepartum care, vaginal delivery (with or without episiotomy, and/or forceps) and postpartum care                                   | 2110307  | Delivery record only (DELIV) | Delivery | Conditions |  |
| Other specified instrumental delivery                                                                                                                                 | 2004731  | Delivery record only (DELIV) | Delivery | Conditions |  |
| Other vacuum extraction                                                                                                                                               | 2004730  | Delivery record only (DELIV) | Delivery | Conditions |  |
| Other total breech extraction                                                                                                                                         | 2004726  | Delivery record only (DELIV) | Delivery | Conditions |  |
| Other partial breech extraction                                                                                                                                       | 2004724  | Delivery record only (DELIV) | Delivery | Conditions |  |
| Other high forceps operation                                                                                                                                          | 2004710  | Delivery record only (DELIV) | Delivery | Conditions |  |
| Other mid forceps operation                                                                                                                                           | 2004707  | Delivery record only (DELIV) | Delivery | Conditions |  |
| Forceps, vacuum, and breech delivery                                                                                                                                  | 2004702  | Delivery record only (DELIV) | Delivery | Conditions |  |
| Vacuum extractor delivery - delivered                                                                                                                                 | 442069   | Delivery record only (DELIV) | Delivery | Conditions |  |
| Delivery normal                                                                                                                                                       | 441641   | Delivery record only (DELIV) | Delivery | Conditions |  |
| Elderly primigravida - delivered                                                                                                                                      | 440794   | Delivery record only (DELIV) | Delivery | Conditions |  |
| Deliveries by breech extraction                                                                                                                                       | 440793   | Delivery record only (DELIV) | Delivery | Conditions |  |
| Deliveries by vacuum extractor                                                                                                                                        | 440790   | Delivery record only (DELIV) | Delivery | Conditions |  |
| Triplet pregnancy - delivered                                                                                                                                         | 440462   | Delivery record only (DELIV) | Delivery | Conditions |  |
| Quadruplet pregnancy - delivered                                                                                                                                      | 438481   | Delivery record only (DELIV) | Delivery | Conditions |  |
| Breech extraction - delivered                                                                                                                                         | 436767   | Delivery record only (DELIV) | Delivery | Conditions |  |
| Forceps delivery - delivered                                                                                                                                          | 435022   | Delivery record only (DELIV) | Delivery | Conditions |  |
| Twin pregnancy - delivered                                                                                                                                            | 435018   | Delivery record only (DELIV) | Delivery | Conditions |  |
| Grand multiparity - delivered                                                                                                                                         | 434110   | Delivery record only (DELIV) | Delivery | Conditions |  |
| Mother delivered                                                                                                                                                      | 433260   | Delivery record only (DELIV) | Delivery | Conditions |  |
| Breech presentation - delivered                                                                                                                                       | 73537    | Delivery record only (DELIV) | Delivery | Conditions |  |
| Triplet liveborn in hospital by cesarean section                                                                                                                      | 42539210 | Delivery record only (DELIV) | Delivery | Conditions |  |
| Twin liveborn born in hospital by cesarean section                                                                                                                    | 40483101 | Delivery record only (DELIV) | Delivery | Conditions |  |
| Multiple delivery, all by cesarean section                                                                                                                            | 4063163  | Delivery record only (DELIV) | Delivery | Conditions |  |
| Delayed delivery second twin - delivered                                                                                                                              | 4064559  | Delivery record only (DELIV) | Delivery | Conditions |  |
| Locked twins - delivered                                                                                                                                              | 442422   | Delivery record only (DELIV) | Delivery | Conditions |  |
| Multiple pregnancy with malpresentation - delivered                                                                                                                   | 442082   | Delivery record only (DELIV) | Delivery | Conditions |  |
| Emergency lower segment cesarean section with inverted T incision                                                                                                     | 46270991 | Delivery record only (DELIV) | Delivery | Conditions |  |
| Other specified other cesarean delivery                                                                                                                               | 44513733 | Delivery record only (DELIV) | Delivery | Conditions |  |
| Other specified elective cesarean delivery                                                                                                                            | 44513729 | Delivery record only (DELIV) | Delivery | Conditions |  |
| Cesarean section through J shaped incision of uterus                                                                                                                  | 42872493 | Delivery record only (DELIV) | Delivery | Conditions |  |
| Cesarean section through inverted T shaped incision of uterus                                                                                                         | 42872492 | Delivery record only (DELIV) | Delivery | Conditions |  |
| Emergency lower segment cesarean section with bilateral tubal ligation                                                                                                | 42537021 | Delivery record only (DELIV) | Delivery | Conditions |  |
| Elective lower segment cesarean section with bilateral tubal ligation                                                                                                 | 42536960 | Delivery record only (DELIV) | Delivery | Conditions |  |
| Emergency upper segment cesarean section with bilateral tubal ligation                                                                                                | 42536954 | Delivery record only (DELIV) | Delivery | Conditions |  |
| Elective upper segment cesarean section with bilateral tubal ligation                                                                                                 | 42536952 | Delivery record only (DELIV) | Delivery | Conditions |  |
| Single liveborn born in hospital by cesarean section                                                                                                                  | 40483521 | Delivery record only (DELIV) | Delivery | Conditions |  |
| Liveborn born in hospital by cesarean section                                                                                                                         | 40483126 | Delivery record only (DELIV) | Delivery | Conditions |  |

|                                                                                                                                                                                                                     |          |                              |          |            |  |
|---------------------------------------------------------------------------------------------------------------------------------------------------------------------------------------------------------------------|----------|------------------------------|----------|------------|--|
| Cesarean section w/o CC/MCC                                                                                                                                                                                         | 38001486 | Delivery record only (DELIV) | Delivery | Conditions |  |
| Cesarean section w CC/MCC                                                                                                                                                                                           | 38001485 | Delivery record only (DELIV) | Delivery | Conditions |  |
| Lower uterine segment cesarean section                                                                                                                                                                              | 37312440 | Delivery record only (DELIV) | Delivery | Conditions |  |
| Preterm delivery following Cesarean section                                                                                                                                                                         | 37110284 | Delivery record only (DELIV) | Delivery | Conditions |  |
| Born by emergency cesarean section                                                                                                                                                                                  | 4250010  | Delivery record only (DELIV) | Delivery | Conditions |  |
| Vaginal cesarean section                                                                                                                                                                                            | 4228344  | Delivery record only (DELIV) | Delivery | Conditions |  |
| Classical cesarean section                                                                                                                                                                                          | 4223536  | Delivery record only (DELIV) | Delivery | Conditions |  |
| Born by elective cesarean section                                                                                                                                                                                   | 4212794  | Delivery record only (DELIV) | Delivery | Conditions |  |
| Extraperitoneal cesarean section                                                                                                                                                                                    | 4211824  | Delivery record only (DELIV) | Delivery | Conditions |  |
| Born by cesarean section                                                                                                                                                                                            | 4192676  | Delivery record only (DELIV) | Delivery | Conditions |  |
| Placenta previa found before labor AND delivery by cesarean section without hemorrhage                                                                                                                              | 4172142  | Delivery record only (DELIV) | Delivery | Conditions |  |
| Anesthesia for cesarean section                                                                                                                                                                                     | 4171820  | Delivery record only (DELIV) | Delivery | Conditions |  |
| Emergency cesarean section                                                                                                                                                                                          | 4167089  | Delivery record only (DELIV) | Delivery | Conditions |  |
| Abdominal delivery for shoulder dystocia                                                                                                                                                                            | 4130321  | Delivery record only (DELIV) | Delivery | Conditions |  |
| Emergency lower segment cesarean section                                                                                                                                                                            | 4127252  | Delivery record only (DELIV) | Delivery | Conditions |  |
| Delivered by cesarean delivery following previous cesarean delivery                                                                                                                                                 | 4119336  | Delivery record only (DELIV) | Delivery | Conditions |  |
| Delivered by cesarean section - pregnancy at term                                                                                                                                                                   | 4118802  | Delivery record only (DELIV) | Delivery | Conditions |  |
| Elective cesarean section                                                                                                                                                                                           | 4075182  | Delivery record only (DELIV) | Delivery | Conditions |  |
| Elective lower segment cesarean section                                                                                                                                                                             | 4075161  | Delivery record only (DELIV) | Delivery | Conditions |  |
| Elective upper segment cesarean section                                                                                                                                                                             | 4075160  | Delivery record only (DELIV) | Delivery | Conditions |  |
| Delivery by emergency cesarean section                                                                                                                                                                              | 4066112  | Delivery record only (DELIV) | Delivery | Conditions |  |
| Cesarean section - pregnancy at term                                                                                                                                                                                | 4066111  | Delivery record only (DELIV) | Delivery | Conditions |  |
| Cesarean section following previous cesarean section                                                                                                                                                                | 4065739  | Delivery record only (DELIV) | Delivery | Conditions |  |
| Delivery by elective cesarean section                                                                                                                                                                               | 4061457  | Delivery record only (DELIV) | Delivery | Conditions |  |
| Emergency upper segment cesarean section                                                                                                                                                                            | 4032767  | Delivery record only (DELIV) | Delivery | Conditions |  |
| Cesarean section                                                                                                                                                                                                    | 4015701  | Delivery record only (DELIV) | Delivery | Conditions |  |
| Cesarean delivery only, following attempted vaginal delivery after previous cesarean delivery; including postpartum care                                                                                            | 2110324  | Delivery record only (DELIV) | Delivery | Conditions |  |
| Cesarean delivery only, following attempted vaginal delivery after previous cesarean delivery                                                                                                                       | 2110323  | Delivery record only (DELIV) | Delivery | Conditions |  |
| Cesarean delivery only; including postpartum care                                                                                                                                                                   | 2110317  | Delivery record only (DELIV) | Delivery | Conditions |  |
| Cesarean delivery only                                                                                                                                                                                              | 2110316  | Delivery record only (DELIV) | Delivery | Conditions |  |
| Anesthesia for cesarean delivery following neuraxial labor analgesia/anesthesia (List separately in addition to code for primary procedure performed)                                                               | 2101814  | Delivery record only (DELIV) | Delivery | Conditions |  |
| Anesthesia for cesarean delivery only                                                                                                                                                                               | 2101807  | Delivery record only (DELIV) | Delivery | Conditions |  |
| Neuraxial analgesia/anesthesia for labor ending in a cesarean delivery (includes any repeat subarachnoid needle placement and drug injection and/or any necessary replacement of an epidural catheter during labor) | 2101016  | Delivery record only (DELIV) | Delivery | Conditions |  |
| Anesthesia for intraperitoneal procedures in lower abdomen including laparoscopy; cesarean section                                                                                                                  | 2101013  | Delivery record only (DELIV) | Delivery | Conditions |  |
| Other cesarean section of unspecified type                                                                                                                                                                          | 2004802  | Delivery record only (DELIV) | Delivery | Conditions |  |
| Cesarean section of other specified type                                                                                                                                                                            | 2004789  | Delivery record only (DELIV) | Delivery | Conditions |  |
| Low cervical cesarean section                                                                                                                                                                                       | 2004786  | Delivery record only (DELIV) | Delivery | Conditions |  |
| Cesarean delivery - delivered                                                                                                                                                                                       | 437942   | Delivery record only (DELIV) | Delivery | Conditions |  |
| Deliveries by cesarean                                                                                                                                                                                              | 193277   | Delivery record only (DELIV) | Delivery | Conditions |  |
| Cystocele - delivered with postpartum complication                                                                                                                                                                  | 4129700  | Delivery record only (DELIV) | Delivery | Conditions |  |
| Hemorrhoids in pregnancy and the puerperium - delivered with postnatal complication                                                                                                                                 | 4066133  | Delivery record only (DELIV) | Delivery | Conditions |  |
| Puerperal septicemia - delivered with postnatal complication                                                                                                                                                        | 4066124  | Delivery record only (DELIV) | Delivery | Conditions |  |
| Puerperal peritonitis - delivered with postnatal complication                                                                                                                                                       | 4066122  | Delivery record only (DELIV) | Delivery | Conditions |  |
| Puerperal endometritis - delivered with postnatal complication                                                                                                                                                      | 4065749  | Delivery record only (DELIV) | Delivery | Conditions |  |
| Obstetric anesthesia with central nervous system complications - delivered                                                                                                                                          | 4065622  | Delivery record only (DELIV) | Delivery | Conditions |  |
| Obstetric anesthesia with cardiac complications - delivered                                                                                                                                                         | 4065621  | Delivery record only (DELIV) | Delivery | Conditions |  |
| Secondary postpartum hemorrhage - delivered with postnatal problem                                                                                                                                                  | 4065618  | Delivery record only (DELIV) | Delivery | Conditions |  |
| Rupture of uterus during and after labor - delivered with postnatal problem                                                                                                                                         | 4064960  | Delivery record only (DELIV) | Delivery | Conditions |  |
| Hypertonic uterine inertia - delivered                                                                                                                                                                              | 4064834  | Delivery record only (DELIV) | Delivery | Conditions |  |
| Persistent occipitoposterior or occipitoanterior position - delivered                                                                                                                                               | 4064426  | Delivery record only (DELIV) | Delivery | Conditions |  |
| Fetus with drug damage - delivered                                                                                                                                                                                  | 4064177  | Delivery record only (DELIV) | Delivery | Conditions |  |
| Fetus with viral damage via mother - delivered                                                                                                                                                                      | 4064174  | Delivery record only (DELIV) | Delivery | Conditions |  |
| Fetus with hereditary disease - delivered                                                                                                                                                                           | 4064171  | Delivery record only (DELIV) | Delivery | Conditions |  |
| Fetal distress - delivered                                                                                                                                                                                          | 4063305  | Delivery record only (DELIV) | Delivery | Conditions |  |
| Fetus with damage due to intrauterine contraceptive device - delivered                                                                                                                                              | 4063296  | Delivery record only (DELIV) | Delivery | Conditions |  |
| Transverse lie - delivered                                                                                                                                                                                          | 4063171  | Delivery record only (DELIV) | Delivery | Conditions |  |
| Glycosuria during pregnancy - delivered                                                                                                                                                                             | 4063028  | Delivery record only (DELIV) | Delivery | Conditions |  |
| Fatigue during pregnancy - delivered with postnatal complication                                                                                                                                                    | 4062572  | Delivery record only (DELIV) | Delivery | Conditions |  |
| Fatigue during pregnancy - delivered                                                                                                                                                                                | 4062571  | Delivery record only (DELIV) | Delivery | Conditions |  |
| Hemorrhoids in pregnancy and the puerperium - delivered                                                                                                                                                             | 4062268  | Delivery record only (DELIV) | Delivery | Conditions |  |
| Obstetric anesthesia with pulmonary complications - delivered with postnatal problem                                                                                                                                | 4062116  | Delivery record only (DELIV) | Delivery | Conditions |  |
| Obstetric anesthesia with pulmonary complications - delivered                                                                                                                                                       | 4062115  | Delivery record only (DELIV) | Delivery | Conditions |  |
| Puerperal salpingitis - delivered with postnatal complication                                                                                                                                                       | 4061465  | Delivery record only (DELIV) | Delivery | Conditions |  |
| Obstetric anesthesia with central nervous system complication - delivered with postnatal problem                                                                                                                    | 4061349  | Delivery record only (DELIV) | Delivery | Conditions |  |
| Obstetric anesthesia with cardiac complications - delivered with postnatal problem                                                                                                                                  | 4061346  | Delivery record only (DELIV) | Delivery | Conditions |  |
| Prolonged artificial rupture of membranes - delivered                                                                                                                                                               | 4060695  | Delivery record only (DELIV) | Delivery | Conditions |  |

|                                                                                                              |         |                              |          |            |  |
|--------------------------------------------------------------------------------------------------------------|---------|------------------------------|----------|------------|--|
| Fetus with radiation damage - delivered                                                                      | 4060675 | Delivery record only (DELIV) | Delivery | Conditions |  |
| Uterine scar from previous surgery in pregnancy, childbirth and the puerperium - delivered                   | 4060558 | Delivery record only (DELIV) | Delivery | Conditions |  |
| Brow presentation - delivered                                                                                | 4060540 | Delivery record only (DELIV) | Delivery | Conditions |  |
| Face presentation - delivered                                                                                | 4060539 | Delivery record only (DELIV) | Delivery | Conditions |  |
| Herpes gestationis - delivered                                                                               | 4060301 | Delivery record only (DELIV) | Delivery | Conditions |  |
| Umbilical cord tight around neck - delivered                                                                 | 4060157 | Delivery record only (DELIV) | Delivery | Conditions |  |
| Oblique lie - delivered                                                                                      | 4059757 | Delivery record only (DELIV) | Delivery | Conditions |  |
| Eclampsia with postnatal complication                                                                        | 4058536 | Delivery record only (DELIV) | Delivery | Conditions |  |
| Antepartum hemorrhage with uterine leiomyoma - delivered                                                     | 4058526 | Delivery record only (DELIV) | Delivery | Conditions |  |
| Antepartum hemorrhage with trauma - delivered                                                                | 4058524 | Delivery record only (DELIV) | Delivery | Conditions |  |
| Glycosuria during pregnancy - delivered with postnatal complication                                          | 4058111 | Delivery record only (DELIV) | Delivery | Conditions |  |
| Herpes gestationis - delivered with postnatal complication                                                   | 4058110 | Delivery record only (DELIV) | Delivery | Conditions |  |
| Rectocele - delivered with postpartum complication                                                           | 4028632 | Delivery record only (DELIV) | Delivery | Conditions |  |
| Failed trial of labor - delivered                                                                            | 443521  | Delivery record only (DELIV) | Delivery | Conditions |  |
| Papyraceous fetus - delivered                                                                                | 443324  | Delivery record only (DELIV) | Delivery | Conditions |  |
| Obstetric non-purulent mastitis - delivered                                                                  | 443294  | Delivery record only (DELIV) | Delivery | Conditions |  |
| Antepartum hemorrhage with coagulation defect - delivered                                                    | 443133  | Delivery record only (DELIV) | Delivery | Conditions |  |
| Pelvic soft tissue abnormality in pregnancy, childbirth and the puerperium - delivered                       | 442829  | Delivery record only (DELIV) | Delivery | Conditions |  |
| Fetus with central nervous system malformation - delivered                                                   | 442828  | Delivery record only (DELIV) | Delivery | Conditions |  |
| Obstetric pyemic and septic pulmonary embolism - delivered                                                   | 442420  | Delivery record only (DELIV) | Delivery | Conditions |  |
| Puerperal cerebrovascular disorder - delivered                                                               | 442419  | Delivery record only (DELIV) | Delivery | Conditions |  |
| Puerperal cerebrovascular disorder - delivered with postnatal complication                                   | 442418  | Delivery record only (DELIV) | Delivery | Conditions |  |
| Placental polyp - delivered with postnatal complication                                                      | 442090  | Delivery record only (DELIV) | Delivery | Conditions |  |
| Obstetric nipple infection - delivered                                                                       | 442089  | Delivery record only (DELIV) | Delivery | Conditions |  |
| Obstetric laceration of cervix - delivered                                                                   | 442080  | Delivery record only (DELIV) | Delivery | Conditions |  |
| Obstetric shock - delivered                                                                                  | 442072  | Delivery record only (DELIV) | Delivery | Conditions |  |
| Maternal hypotension syndrome - delivered                                                                    | 442070  | Delivery record only (DELIV) | Delivery | Conditions |  |
| Varicose veins of legs in pregnancy and the puerperium - delivered                                           | 442059  | Delivery record only (DELIV) | Delivery | Conditions |  |
| Amniotic fluid pulmonary embolism - delivered                                                                | 442054  | Delivery record only (DELIV) | Delivery | Conditions |  |
| Obstetric blood-clot pulmonary embolism - delivered                                                          | 442053  | Delivery record only (DELIV) | Delivery | Conditions |  |
| Obstetric air pulmonary embolism - delivered with postnatal complication                                     | 442052  | Delivery record only (DELIV) | Delivery | Conditions |  |
| Obstetric air pulmonary embolism - delivered                                                                 | 442049  | Delivery record only (DELIV) | Delivery | Conditions |  |
| Obstetric pyemic and septic pulmonary embolism - delivered with postnatal complication                       | 442048  | Delivery record only (DELIV) | Delivery | Conditions |  |
| Failed mechanical induction - delivered                                                                      | 441924  | Delivery record only (DELIV) | Delivery | Conditions |  |
| Antenatal deep vein thrombosis - delivered                                                                   | 441649  | Delivery record only (DELIV) | Delivery | Conditions |  |
| Prolapse of cord - delivered                                                                                 | 441645  | Delivery record only (DELIV) | Delivery | Conditions |  |
| Maternal distress - delivered with postnatal problem                                                         | 441643  | Delivery record only (DELIV) | Delivery | Conditions |  |
| History of recurrent miscarriage - delivered                                                                 | 441630  | Delivery record only (DELIV) | Delivery | Conditions |  |
| Cervical incompetence - delivered                                                                            | 441369  | Delivery record only (DELIV) | Delivery | Conditions |  |
| Postpartum coagulation defects - delivered with postnatal problem                                            | 441363  | Delivery record only (DELIV) | Delivery | Conditions |  |
| Cracked nipple in pregnancy, the puerperium or lactation - delivered with postnatal complication             | 440481  | Delivery record only (DELIV) | Delivery | Conditions |  |
| Prolonged first stage - delivered                                                                            | 440475  | Delivery record only (DELIV) | Delivery | Conditions |  |
| Post-term pregnancy - delivered                                                                              | 439894  | Delivery record only (DELIV) | Delivery | Conditions |  |
| Superficial thrombophlebitis in pregnancy and the puerperium - delivered with postnatal complication         | 439095  | Delivery record only (DELIV) | Delivery | Conditions |  |
| Superficial thrombophlebitis in pregnancy and the puerperium - delivered                                     | 439094  | Delivery record only (DELIV) | Delivery | Conditions |  |
| Cord tangled with compression - delivered                                                                    | 439092  | Delivery record only (DELIV) | Delivery | Conditions |  |
| Severe pre-eclampsia - delivered with postnatal complication                                                 | 439077  | Delivery record only (DELIV) | Delivery | Conditions |  |
| Severe pre-eclampsia - delivered                                                                             | 438490  | Delivery record only (DELIV) | Delivery | Conditions |  |
| Precipitate labor - delivered                                                                                | 438220  | Delivery record only (DELIV) | Delivery | Conditions |  |
| Amniotic cavity infection - delivered                                                                        | 437936  | Delivery record only (DELIV) | Delivery | Conditions |  |
| Fetal intrauterine distress first noted during labor AND/OR delivery in liveborn infant                      | 437098  | Delivery record only (DELIV) | Delivery | Conditions |  |
| Obstetric nipple infection - delivered with postnatal complication                                           | 437055  | Delivery record only (DELIV) | Delivery | Conditions |  |
| Varicose veins of perineum and vulva in pregnancy and the puerperium - delivered with postnatal complication | 436766  | Delivery record only (DELIV) | Delivery | Conditions |  |
| Maternal distress - delivered                                                                                | 436183  | Delivery record only (DELIV) | Delivery | Conditions |  |
| Hyperemesis gravidarum with metabolic disturbance - delivered                                                | 436173  | Delivery record only (DELIV) | Delivery | Conditions |  |
| Retracted nipple in pregnancy, the puerperium or lactation - delivered                                       | 435612  | Delivery record only (DELIV) | Delivery | Conditions |  |
| Varicose veins of perineum and vulva in pregnancy and the puerperium - delivered                             | 435610  | Delivery record only (DELIV) | Delivery | Conditions |  |
| Vasa previa - delivered                                                                                      | 435609  | Delivery record only (DELIV) | Delivery | Conditions |  |
| Cervical incompetence - delivered with postnatal complication                                                | 435607  | Delivery record only (DELIV) | Delivery | Conditions |  |
| Varicose veins of legs in pregnancy and the puerperium - delivered with postnatal complication               | 435330  | Delivery record only (DELIV) | Delivery | Conditions |  |
| Postnatal deep vein thrombosis - delivered with postnatal complication                                       | 435031  | Delivery record only (DELIV) | Delivery | Conditions |  |
| Short cord - delivered                                                                                       | 435020  | Delivery record only (DELIV) | Delivery | Conditions |  |
| Cracked nipple in pregnancy, the puerperium or lactation - delivered                                         | 434715  | Delivery record only (DELIV) | Delivery | Conditions |  |
| Puerperal pyrexia of unknown origin - delivered with postnatal complication                                  | 434713  | Delivery record only (DELIV) | Delivery | Conditions |  |
| Prolonged second stage - delivered                                                                           | 434431  | Delivery record only (DELIV) | Delivery | Conditions |  |
| Polyhydramnios - delivered                                                                                   | 434427  | Delivery record only (DELIV) | Delivery | Conditions |  |
| Obstetric blood-clot pulmonary embolism - delivered with postnatal complication                              | 434112  | Delivery record only (DELIV) | Delivery | Conditions |  |
| Tuberculosis in pregnancy, childbirth and the puerperium - delivered                                         | 433812  | Delivery record only (DELIV) | Delivery | Conditions |  |

|                                                                                                                             |        |                              |          |            |  |
|-----------------------------------------------------------------------------------------------------------------------------|--------|------------------------------|----------|------------|--|
| Retracted nipple in pregnancy, the puerperium or lactation - delivered with postnatal complication                          | 433276 | Delivery record only (DELIV) | Delivery | Conditions |  |
| Oligohydramnios - delivered                                                                                                 | 433274 | Delivery record only (DELIV) | Delivery | Conditions |  |
| Amniotic fluid pulmonary embolism - delivered with postnatal complication                                                   | 432388 | Delivery record only (DELIV) | Delivery | Conditions |  |
| Vascular lesions of cord - delivered                                                                                        | 321367 | Delivery record only (DELIV) | Delivery | Conditions |  |
| Benign essential hypertension complicating pregnancy, childbirth and the puerperium - delivered with postnatal complication | 320456 | Delivery record only (DELIV) | Delivery | Conditions |  |
| Benign essential hypertension complicating pregnancy, childbirth and the puerperium - delivered                             | 314103 | Delivery record only (DELIV) | Delivery | Conditions |  |
| Maternal hypotension syndrome - delivered with postnatal problem                                                            | 313829 | Delivery record only (DELIV) | Delivery | Conditions |  |
| Renal hypertension complicating pregnancy, childbirth and the puerperium - delivered with postnatal complication            | 201912 | Delivery record only (DELIV) | Delivery | Conditions |  |
| Obstetric pelvic hematoma - delivered                                                                                       | 201368 | Delivery record only (DELIV) | Delivery | Conditions |  |
| Placenta previa without hemorrhage - delivered                                                                              | 201359 | Delivery record only (DELIV) | Delivery | Conditions |  |
| Premature rupture of membranes - delivered                                                                                  | 200160 | Delivery record only (DELIV) | Delivery | Conditions |  |
| Renal hypertension complicating pregnancy, childbirth and the puerperium - delivered                                        | 200157 | Delivery record only (DELIV) | Delivery | Conditions |  |
| Obstructed labor caused by bony pelvis - delivered                                                                          | 199087 | Delivery record only (DELIV) | Delivery | Conditions |  |
| Rupture of uterus before labor - delivered                                                                                  | 198816 | Delivery record only (DELIV) | Delivery | Conditions |  |
| Second degree perineal tear during delivery - delivered                                                                     | 198499 | Delivery record only (DELIV) | Delivery | Conditions |  |
| Disproportion - major pelvic abnormality - delivered                                                                        | 198486 | Delivery record only (DELIV) | Delivery | Conditions |  |
| Retroverted incarcerated gravid uterus - delivered                                                                          | 198216 | Delivery record only (DELIV) | Delivery | Conditions |  |
| Retroverted incarcerated gravid uterus - delivered with postnatal complication                                              | 197616 | Delivery record only (DELIV) | Delivery | Conditions |  |
| Obstetric inversion of uterus - delivered with postnatal problem                                                            | 197048 | Delivery record only (DELIV) | Delivery | Conditions |  |
| Peripheral neuritis in pregnancy - delivered                                                                                | 197042 | Delivery record only (DELIV) | Delivery | Conditions |  |
| Primary uterine inertia - delivered                                                                                         | 196762 | Delivery record only (DELIV) | Delivery | Conditions |  |
| Obstructed labor caused by pelvic soft tissues - delivered                                                                  | 196182 | Delivery record only (DELIV) | Delivery | Conditions |  |
| Liver disorder in pregnancy - delivered                                                                                     | 196170 | Delivery record only (DELIV) | Delivery | Conditions |  |
| Rhesus isoimmunization - delivered                                                                                          | 195878 | Delivery record only (DELIV) | Delivery | Conditions |  |
| Obstetric shock - delivered with postnatal problem                                                                          | 195025 | Delivery record only (DELIV) | Delivery | Conditions |  |
| Obstructed labor due to fetal malposition - delivered                                                                       | 194711 | Delivery record only (DELIV) | Delivery | Conditions |  |
| Fourth degree perineal tear during delivery - delivered                                                                     | 194429 | Delivery record only (DELIV) | Delivery | Conditions |  |
| Cesarean wound disruption - delivered with postnatal complication                                                           | 194113 | Delivery record only (DELIV) | Delivery | Conditions |  |
| Placental abruption - delivered                                                                                             | 193539 | Delivery record only (DELIV) | Delivery | Conditions |  |
| Fetal-maternal hemorrhage - delivered                                                                                       | 193535 | Delivery record only (DELIV) | Delivery | Conditions |  |
| Third degree perineal tear during delivery - delivered                                                                      | 193275 | Delivery record only (DELIV) | Delivery | Conditions |  |
| Obstetric pelvic hematoma - delivered with postnatal problem                                                                | 193271 | Delivery record only (DELIV) | Delivery | Conditions |  |
| Obstetric high vaginal laceration - delivered                                                                               | 193269 | Delivery record only (DELIV) | Delivery | Conditions |  |
| Placenta previa with hemorrhage - delivered                                                                                 | 193264 | Delivery record only (DELIV) | Delivery | Conditions |  |
| First degree perineal tear during delivery - delivered                                                                      | 192978 | Delivery record only (DELIV) | Delivery | Conditions |  |
| Pelvic soft tissue abnormality in pregnancy, childbirth and the puerperium - delivered with postnatal complication          | 192971 | Delivery record only (DELIV) | Delivery | Conditions |  |
| Rupture of uterus during and after labor - delivered                                                                        | 192699 | Delivery record only (DELIV) | Delivery | Conditions |  |
| Obstetric perineal wound disruption - delivered with postnatal complication                                                 | 192387 | Delivery record only (DELIV) | Delivery | Conditions |  |
| Secondary uterine inertia - delivered                                                                                       | 192384 | Delivery record only (DELIV) | Delivery | Conditions |  |
| Transient hypertension of pregnancy - delivered with postnatal complication                                                 | 141639 | Delivery record only (DELIV) | Delivery | Conditions |  |
| Eclampsia - delivered with postnatal complication                                                                           | 138811 | Delivery record only (DELIV) | Delivery | Conditions |  |
| Transient hypertension of pregnancy - delivered                                                                             | 137940 | Delivery record only (DELIV) | Delivery | Conditions |  |
| Pre-eclampsia or eclampsia with pre-existing hypertension - delivered                                                       | 135601 | Delivery record only (DELIV) | Delivery | Conditions |  |
| Pre-eclampsia or eclampsia with pre-existing hypertension - delivered with postnatal complication                           | 134414 | Delivery record only (DELIV) | Delivery | Conditions |  |
| Eclampsia - delivered                                                                                                       | 133816 | Delivery record only (DELIV) | Delivery | Conditions |  |
| Genitourinary tract infection in pregnancy - delivered                                                                      | 81357  | Delivery record only (DELIV) | Delivery | Conditions |  |
| Breast engorgement in pregnancy, the puerperium or lactation - delivered with postnatal complication                        | 81086  | Delivery record only (DELIV) | Delivery | Conditions |  |
| Large fetus causing disproportion - delivered                                                                               | 80782  | Delivery record only (DELIV) | Delivery | Conditions |  |
| Genitourinary tract infection in pregnancy - delivered with postnatal complication                                          | 80778  | Delivery record only (DELIV) | Delivery | Conditions |  |
| Failure of lactation - delivered with postnatal complication                                                                | 80479  | Delivery record only (DELIV) | Delivery | Conditions |  |
| Shoulder dystocia - delivered                                                                                               | 80474  | Delivery record only (DELIV) | Delivery | Conditions |  |
| Obstetric non-purulent mastitis - delivered with postnatal complication                                                     | 79897  | Delivery record only (DELIV) | Delivery | Conditions |  |
| Unstable lie - delivered                                                                                                    | 79889  | Delivery record only (DELIV) | Delivery | Conditions |  |
| Obstetric breast abscess - delivered with postnatal complication                                                            | 78494  | Delivery record only (DELIV) | Delivery | Conditions |  |
| Breast engorgement in pregnancy, the puerperium or lactation - delivered                                                    | 77624  | Delivery record only (DELIV) | Delivery | Conditions |  |
| Inlet pelvic contraction - delivered                                                                                        | 77621  | Delivery record only (DELIV) | Delivery | Conditions |  |
| High head at term - delivered                                                                                               | 77615  | Delivery record only (DELIV) | Delivery | Conditions |  |
| Suppressed lactation - delivered                                                                                            | 77347  | Delivery record only (DELIV) | Delivery | Conditions |  |
| Failure of lactation - delivered                                                                                            | 77056  | Delivery record only (DELIV) | Delivery | Conditions |  |
| Generally contracted pelvis - delivered                                                                                     | 77052  | Delivery record only (DELIV) | Delivery | Conditions |  |
| Suppressed lactation - delivered with postnatal complication                                                                | 76769  | Delivery record only (DELIV) | Delivery | Conditions |  |
| Asymptomatic bacteriuria in pregnancy - delivered                                                                           | 76761  | Delivery record only (DELIV) | Delivery | Conditions |  |
| Deep transverse arrest - delivered                                                                                          | 75882  | Delivery record only (DELIV) | Delivery | Conditions |  |
| Obstetric damage to pelvic joints and ligaments - delivered                                                                 | 75326  | Delivery record only (DELIV) | Delivery | Conditions |  |
| Galactorrhea in pregnancy and the puerperium - delivered with postnatal complication                                        | 74717  | Delivery record only (DELIV) | Delivery | Conditions |  |
| Galactorrhea in pregnancy and the puerperium - delivered                                                                    | 74440  | Delivery record only (DELIV) | Delivery | Conditions |  |

|                                                                                                     |          |                              |          |            |  |
|-----------------------------------------------------------------------------------------------------|----------|------------------------------|----------|------------|--|
| Obstetric breast abscess - delivered                                                                | 74433    | Delivery record only (DELIV) | Delivery | Conditions |  |
| Outlet pelvic contraction - delivered                                                               | 73824    | Delivery record only (DELIV) | Delivery | Conditions |  |
| Hydrocephalic disproportion - delivered                                                             | 73538    | Delivery record only (DELIV) | Delivery | Conditions |  |
| Asymptomatic bacteriuria in pregnancy - delivered with postnatal complication                       | 73526    | Delivery record only (DELIV) | Delivery | Conditions |  |
| Mixed fetopelvic disproportion - delivered                                                          | 72970    | Delivery record only (DELIV) | Delivery | Conditions |  |
| Fetus with chromosomal abnormality - delivered                                                      | 72697    | Delivery record only (DELIV) | Delivery | Conditions |  |
| Prolapsed arm - delivered                                                                           | 72692    | Delivery record only (DELIV) | Delivery | Conditions |  |
| Delivery of Products of Conception, External Approach                                               | 2784578  | Delivery record only (DELIV) | Delivery | Conditions |  |
| Manual Extraction of Products of Conception, Retained, Via Natural or Artificial Opening Endoscopic | 43018345 | Delivery record only (DELIV) | Delivery | Conditions |  |
| Manual Extraction of Products of Conception, Retained, Via Natural or Artificial Opening            | 43018344 | Delivery record only (DELIV) | Delivery | Conditions |  |
| Extraction of Products of Conception, Retained, Via Natural or Artificial Opening Endoscopic        | 2784574  | Delivery record only (DELIV) | Delivery | Conditions |  |
| Extraction of Products of Conception, Retained, Via Natural or Artificial Opening                   | 2784573  | Delivery record only (DELIV) | Delivery | Conditions |  |
| Extraction of Products of Conception, Other, Via Natural or Artificial Opening                      | 2784572  | Delivery record only (DELIV) | Delivery | Conditions |  |
| Extraction of Products of Conception, Internal Version, Via Natural or Artificial Opening           | 2784571  | Delivery record only (DELIV) | Delivery | Conditions |  |
| Extraction of Products of Conception, Vacuum, Via Natural or Artificial Opening                     | 2784570  | Delivery record only (DELIV) | Delivery | Conditions |  |
| Extraction of Products of Conception, High Forceps, Via Natural or Artificial Opening               | 2784569  | Delivery record only (DELIV) | Delivery | Conditions |  |
| Extraction of Products of Conception, Mid Forceps, Via Natural or Artificial Opening                | 2784568  | Delivery record only (DELIV) | Delivery | Conditions |  |
| Extraction of Products of Conception, Low Forceps, Via Natural or Artificial Opening                | 2784567  | Delivery record only (DELIV) | Delivery | Conditions |  |
| Extraction of Products of Conception, Extraperitoneal, Open Approach                                | 2784566  | Delivery record only (DELIV) | Delivery | Conditions |  |
| Extraction of Products of Conception, Low, Open Approach                                            | 2784565  | Delivery record only (DELIV) | Delivery | Conditions |  |
| Extraction of Products of Conception, High, Open Approach                                           | 2784564  | Delivery record only (DELIV) | Delivery | Conditions |  |
| Premature 28 week quadruplet                                                                        | 3174212  | Livebirth (LB)               | Delivery | Conditions |  |
| Premature birth of newborn sextuplets                                                               | 4008884  | Livebirth (LB)               | Delivery | Conditions |  |
| Single live birth                                                                                   | 4014295  | Livebirth (LB)               | Delivery | Conditions |  |
| Twins - both live born                                                                              | 4014296  | Livebirth (LB)               | Delivery | Conditions |  |
| Twins - one still and one live born                                                                 | 4014455  | Livebirth (LB)               | Delivery | Conditions |  |
| Triples - all live born                                                                             | 4014456  | Livebirth (LB)               | Delivery | Conditions |  |
| Triples - two live and one stillborn                                                                | 4015421  | Livebirth (LB)               | Delivery | Conditions |  |
| Triples - one live and two stillborn                                                                | 4015422  | Livebirth (LB)               | Delivery | Conditions |  |
| Premature birth of newborn twins                                                                    | 4029786  | Livebirth (LB)               | Delivery | Conditions |  |
| Term birth of identical twins, both living                                                          | 4049333  | Livebirth (LB)               | Delivery | Conditions |  |
| Term birth of newborn male                                                                          | 4052512  | Livebirth (LB)               | Delivery | Conditions |  |
| Term birth of newborn                                                                               | 4054968  | Livebirth (LB)               | Delivery | Conditions |  |
| Term birth of multiple newborns                                                                     | 4066292  | Livebirth (LB)               | Delivery | Conditions |  |
| Premature birth of multiple newborns                                                                | 4069200  | Livebirth (LB)               | Delivery | Conditions |  |
| Premature birth of newborn quintuplets                                                              | 4082863  | Livebirth (LB)               | Delivery | Conditions |  |
| Livebirth                                                                                           | 4092289  | Livebirth (LB)               | Delivery | Conditions |  |
| Triplet birth                                                                                       | 4094046  | Livebirth (LB)               | Delivery | Conditions |  |
| Premature birth of fraternal twins, both living                                                     | 4097427  | Livebirth (LB)               | Delivery | Conditions |  |
| Twin birth                                                                                          | 4101844  | Livebirth (LB)               | Delivery | Conditions |  |
| Premature birth of newborn triplets                                                                 | 4107401  | Livebirth (LB)               | Delivery | Conditions |  |
| Premature birth of identical twins, both living                                                     | 4142021  | Livebirth (LB)               | Delivery | Conditions |  |
| Premature birth of newborn quadruplets                                                              | 4145125  | Livebirth (LB)               | Delivery | Conditions |  |
| Premature birth of fraternal twins, one living, one stillborn                                       | 4147043  | Livebirth (LB)               | Delivery | Conditions |  |
| Multiple birth                                                                                      | 4163851  | Livebirth (LB)               | Delivery | Conditions |  |
| Premature birth of newborn male                                                                     | 4172135  | Livebirth (LB)               | Delivery | Conditions |  |
| Term birth of newborn twins                                                                         | 4178275  | Livebirth (LB)               | Delivery | Conditions |  |
| Term birth of newborn quadruplets                                                                   | 4193224  | Livebirth (LB)               | Delivery | Conditions |  |
| Term birth of newborn sextuplets                                                                    | 4199146  | Livebirth (LB)               | Delivery | Conditions |  |
| Term birth of fraternal twins, both living                                                          | 4227728  | Livebirth (LB)               | Delivery | Conditions |  |
| Premature birth of newborn female                                                                   | 4241228  | Livebirth (LB)               | Delivery | Conditions |  |
| Term birth of identical twins, one living, one stillborn                                            | 4243026  | Livebirth (LB)               | Delivery | Conditions |  |
| Term birth of newborn female                                                                        | 4246654  | Livebirth (LB)               | Delivery | Conditions |  |
| Premature birth of newborn                                                                          | 4272248  | Livebirth (LB)               | Delivery | Conditions |  |
| Term birth of newborn triplets                                                                      | 4307237  | Livebirth (LB)               | Delivery | Conditions |  |
| Premature birth of identical twins, one living, one stillborn                                       | 4310910  | Livebirth (LB)               | Delivery | Conditions |  |
| Term birth of fraternal twins, one living, one stillborn                                            | 4330570  | Livebirth (LB)               | Delivery | Conditions |  |
| Term birth of newborn quintuplets                                                                   | 4336090  | Livebirth (LB)               | Delivery | Conditions |  |
| Twin live born in hospital by vaginal delivery                                                      | 42535052 | Livebirth (LB)               | Delivery | Conditions |  |
| Triples, some live born                                                                             | 45757165 | Livebirth (LB)               | Delivery | Conditions |  |
| Quadruplets, all live born                                                                          | 45757166 | Livebirth (LB)               | Delivery | Conditions |  |
| Quintuplets, all live born                                                                          | 45757167 | Livebirth (LB)               | Delivery | Conditions |  |
| Quintuplets, some live born                                                                         | 45757168 | Livebirth (LB)               | Delivery | Conditions |  |
| Sextuplets, some live born                                                                          | 45757169 | Livebirth (LB)               | Delivery | Conditions |  |
| Quadruplet birth                                                                                    | 45765500 | Livebirth (LB)               | Delivery | Conditions |  |
| Quintuplet birth                                                                                    | 45765501 | Livebirth (LB)               | Delivery | Conditions |  |
| Sextuplet birth                                                                                     | 45765502 | Livebirth (LB)               | Delivery | Conditions |  |
| Sextuplets, all live born                                                                           | 45772082 | Livebirth (LB)               | Delivery | Conditions |  |
| Quadruplets, some live born                                                                         | 45773428 | Livebirth (LB)               | Delivery | Conditions |  |
| Multiple liveborn in hospital by vaginal delivery                                                   | 42539267 | Livebirth (LB)               | Delivery | Conditions |  |

|                                                                                             |          |                |            |            |  |
|---------------------------------------------------------------------------------------------|----------|----------------|------------|------------|--|
| Triplet liveborn in hospital by cesarean section                                            | 42539210 | Livebirth (LB) | Delivery   | Conditions |  |
| Single liveborn born in hospital by cesarean section                                        | 40483521 | Livebirth (LB) | Delivery   | Conditions |  |
| Liveborn born in hospital by cesarean section                                               | 40483126 | Livebirth (LB) | Delivery   | Conditions |  |
| Twin liveborn born in hospital by cesarean section                                          | 40483101 | Livebirth (LB) | Delivery   | Conditions |  |
| Twin liveborn born in hospital                                                              | 40483084 | Livebirth (LB) | Delivery   | Conditions |  |
| Liveborn born in hospital                                                                   | 40482735 | Livebirth (LB) | Delivery   | Conditions |  |
| Twin liveborn born outside hospital                                                         | 36717637 | Livebirth (LB) | Delivery   | Conditions |  |
| Multiple liveborn other than twins born outside hospital                                    | 36713469 | Livebirth (LB) | Delivery   | Conditions |  |
| Multiple liveborn other than twins born in hospital                                         | 36713468 | Livebirth (LB) | Delivery   | Conditions |  |
| Singleton liveborn unspecified as to place of birth                                         | 36713467 | Livebirth (LB) | Delivery   | Conditions |  |
| Singleton liveborn born outside hospital                                                    | 36713466 | Livebirth (LB) | Delivery   | Conditions |  |
| Singleton liveborn born in hospital                                                         | 36713465 | Livebirth (LB) | Delivery   | Conditions |  |
| Single liveborn born in hospital by vaginal delivery                                        | 36713074 | Livebirth (LB) | Delivery   | Conditions |  |
| Are you currently pregnant?                                                                 | 1585811  | Pregnancy      | Pregnancy  | Survey     |  |
| Pregnant                                                                                    | 4299535  | Pregnancy      | Pregnancy  | Conditions |  |
| High risk pregnancy                                                                         | 4188598  | Pregnancy      | Pregnancy  | Conditions |  |
| High risk pregnancy due to history of preterm labor                                         | 40480278 | Pregnancy      | Pregnancy  | Conditions |  |
| Intrauterine pregnancy                                                                      | 197031   | Pregnancy      | Pregnancy  | Conditions |  |
| Unplanned pregnancy                                                                         | 4307820  | Pregnancy      | Pregnancy  | Conditions |  |
| Normal pregnancy in primigravida                                                            | 36684864 | Pregnancy      | Pregnancy  | Conditions |  |
| Combined tubal and intrauterine pregnancy                                                   | 40483581 | Pregnancy      | Pregnancy  | Conditions |  |
| Pregnant - on history                                                                       | 4061686  | Pregnancy      | Pregnancy  | Conditions |  |
| Surrogate pregnancy                                                                         | 4012559  | Pregnancy      | Pregnancy  | Conditions |  |
| Pregnancy unplanned but wanted                                                              | 4060237  | Pregnancy      | Pregnancy  | Conditions |  |
| High risk pregnancy due to recurrent pregnancy loss                                         | 37018878 | Pregnancy      | Pregnancy  | Conditions |  |
| Normal pregnancy                                                                            | 4217975  | Pregnancy      | Pregnancy  | Conditions |  |
| Unwanted pregnancy                                                                          | 4239301  | Pregnancy      | Pregnancy  | Conditions |  |
| Pregnant - urine test confirms                                                              | 4059981  | Pregnancy      | Pregnancy  | Conditions |  |
| 24 HR paroxetine hydrochloride 37.5 MG Extended Release Oral Tablet [Paxil]                 | 35604762 | Antidepressant | Depression | Drugs      |  |
| venlafaxine 100 MG Oral Tablet [Effexor]                                                    | 19039817 | Antidepressant | Depression | Drugs      |  |
| imipramine                                                                                  | 778268   | Antidepressant | Depression | Drugs      |  |
| vilazodone                                                                                  | 40234834 | Antidepressant | Depression | Drugs      |  |
| doxepin hydrochloride 150 MG Oral Capsule                                                   | 40224891 | Antidepressant | Depression | Drugs      |  |
| nortriptyline 50 MG Oral Capsule                                                            | 19019413 | Antidepressant | Depression | Drugs      |  |
| clomipramine hydrochloride 50 MG Oral Capsule                                               | 40163070 | Antidepressant | Depression | Drugs      |  |
| fluoxetine 10 MG Oral Tablet                                                                | 19079985 | Antidepressant | Depression | Drugs      |  |
| escitalopram 20 MG Oral Tablet [Lexapro]                                                    | 715966   | Antidepressant | Depression | Drugs      |  |
| amitriptyline hydrochloride 100 MG Oral Tablet                                              | 40162683 | Antidepressant | Depression | Drugs      |  |
| citalopram 20 MG Oral Tablet [Citalopraam]                                                  | 19113503 | Antidepressant | Depression | Drugs      |  |
| trazodone hydrochloride 50 MG Oral Tablet [Desyrel]                                         | 40163474 | Antidepressant | Depression | Drugs      |  |
| mirtazapine 45 MG Disintegrating Oral Tablet                                                | 725177   | Antidepressant | Depression | Drugs      |  |
| mirtazapine 15 MG Disintegrating Oral Tablet                                                | 19070747 | Antidepressant | Depression | Drugs      |  |
| doxepin                                                                                     | 738156   | Antidepressant | Depression | Drugs      |  |
| escitalopram 5 MG Oral Tablet                                                               | 715962   | Antidepressant | Depression | Drugs      |  |
| venlafaxine 100 MG Oral Tablet                                                              | 19079835 | Antidepressant | Depression | Drugs      |  |
| escitalopram 10 MG Oral Tablet [Lexapro]                                                    | 715965   | Antidepressant | Depression | Drugs      |  |
| 12 HR bupropion hydrochloride 200 MG Extended Release Oral Tablet                           | 40221864 | Antidepressant | Depression | Drugs      |  |
| milnacipran                                                                                 | 19080226 | Antidepressant | Depression | Drugs      |  |
| 24 HR venlafaxine 150 MG Extended Release Oral Capsule [Effexor]                            | 743794   | Antidepressant | Depression | Drugs      |  |
| desipramine hydrochloride 100 MG Oral Tablet                                                | 40237422 | Antidepressant | Depression | Drugs      |  |
| citalopram 40 MG Oral Tablet [Cipramil]                                                     | 19054100 | Antidepressant | Depression | Drugs      |  |
| venlafaxine 37.5 MG Oral Tablet [Effexor]                                                   | 19039819 | Antidepressant | Depression | Drugs      |  |
| doxepin hydrochloride 10 MG Oral Capsule                                                    | 40224875 | Antidepressant | Depression | Drugs      |  |
| amitriptyline hydrochloride 10 MG Oral Tablet [Elavil]                                      | 40162673 | Antidepressant | Depression | Drugs      |  |
| 24 HR venlafaxine 225 MG Extended Release Oral Tablet                                       | 19132561 | Antidepressant | Depression | Drugs      |  |
| venlafaxine 75 MG Oral Tablet                                                               | 743752   | Antidepressant | Depression | Drugs      |  |
| 24 HR desvenlafaxine succinate 100 MG Extended Release Oral Tablet [Pristiq]                | 19129666 | Antidepressant | Depression | Drugs      |  |
| Smoking Cessation 12 HR bupropion hydrochloride 150 MG Extended Release Oral Tablet [Zyban] | 40221863 | Antidepressant | Depression | Drugs      |  |
| 24 HR venlafaxine 75 MG Extended Release Oral Capsule [Effexor]                             | 743793   | Antidepressant | Depression | Drugs      |  |
| fluoxetine 40 MG Oral Capsule [Prozac]                                                      | 755735   | Antidepressant | Depression | Drugs      |  |
| duloxetine 20 MG Delayed Release Oral Capsule [Cymbalta]                                    | 715295   | Antidepressant | Depression | Drugs      |  |
| 24 HR bupropion hydrochloride 300 MG Extended Release Oral Tablet [Wellbutrin]              | 40221876 | Antidepressant | Depression | Drugs      |  |
| duloxetine 30 MG Delayed Release Oral Capsule [Cymbalta]                                    | 715298   | Antidepressant | Depression | Drugs      |  |
| vortioxetine 20 MG Oral Tablet                                                              | 44506612 | Antidepressant | Depression | Drugs      |  |
| fluvoxamine maleate 100 MG Oral Tablet                                                      | 40174725 | Antidepressant | Depression | Drugs      |  |
| nortriptyline 75 MG Oral Capsule                                                            | 19019414 | Antidepressant | Depression | Drugs      |  |
| venlafaxine 37.5 MG Oral Tablet                                                             | 743720   | Antidepressant | Depression | Drugs      |  |
| doxepin hydrochloride 25 MG Oral Capsule                                                    | 40224897 | Antidepressant | Depression | Drugs      |  |
| fluoxetine 20 MG Oral Capsule [Selfemra]                                                    | 19130466 | Antidepressant | Depression | Drugs      |  |
| desipramine hydrochloride 50 MG Oral Tablet                                                 | 40237441 | Antidepressant | Depression | Drugs      |  |
| bupropion hydrochloride 75 MG Oral Tablet                                                   | 40222092 | Antidepressant | Depression | Drugs      |  |



|                                                                                                                                                                                                                                                                |          |                |            |       |  |
|----------------------------------------------------------------------------------------------------------------------------------------------------------------------------------------------------------------------------------------------------------------|----------|----------------|------------|-------|--|
| trazodone hydrochloride 300 MG Oral Tablet                                                                                                                                                                                                                     | 40163468 | Antidepressant | Depression | Drugs |  |
| sertraline 25 MG Oral Tablet [Zoloft]                                                                                                                                                                                                                          | 739202   | Antidepressant | Depression | Drugs |  |
| 24 HR paroxetine hydrochloride 12.5 MG Extended Release Oral Tablet                                                                                                                                                                                            | 35604757 | Antidepressant | Depression | Drugs |  |
| citalopram 10 MG Oral Tablet [Celexa]                                                                                                                                                                                                                          | 797633   | Antidepressant | Depression | Drugs |  |
| 24 HR venlafaxine 150 MG Extended Release Oral Tablet                                                                                                                                                                                                          | 19132560 | Antidepressant | Depression | Drugs |  |
| 24 HR bupropion hydrochloride 150 MG Extended Release Oral Tablet [Wellbutrin]                                                                                                                                                                                 | 40221873 | Antidepressant | Depression | Drugs |  |
| bupropion hydrochloride 100 MG Oral Tablet                                                                                                                                                                                                                     | 40222060 | Antidepressant | Depression | Drugs |  |
| mirtazapine 45 MG Oral Tablet                                                                                                                                                                                                                                  | 725179   | Antidepressant | Depression | Drugs |  |
| paroxetine hydrochloride 30 MG Oral Tablet                                                                                                                                                                                                                     | 35604581 | Antidepressant | Depression | Drugs |  |
| fluvoxamine maleate 25 MG Oral Tablet                                                                                                                                                                                                                          | 40174735 | Antidepressant | Depression | Drugs |  |
| milnacipran hydrochloride 50 MG Oral Tablet [Savella]                                                                                                                                                                                                          | 19080256 | Antidepressant | Depression | Drugs |  |
| 24 HR desvenlafaxine succinate 100 MG Extended Release Oral Tablet                                                                                                                                                                                             | 1593107  | Antidepressant | Depression | Drugs |  |
| fluoxetine 4 MG/ML Oral Solution                                                                                                                                                                                                                               | 19077464 | Antidepressant | Depression | Drugs |  |
| doxepin hydrochloride 10 MG Oral Capsule [Sinequan]                                                                                                                                                                                                            | 40224877 | Antidepressant | Depression | Drugs |  |
| trazodone hydrochloride 100 MG Oral Tablet [Desyre]                                                                                                                                                                                                            | 40163461 | Antidepressant | Depression | Drugs |  |
| fluvoxamine maleate 100 MG Oral Tablet [Luvox]                                                                                                                                                                                                                 | 40174726 | Antidepressant | Depression | Drugs |  |
| citalopram 20 MG Oral Tablet [Celexa]                                                                                                                                                                                                                          | 797619   | Antidepressant | Depression | Drugs |  |
| fluoxetine 20 MG Oral Tablet                                                                                                                                                                                                                                   | 755700   | Antidepressant | Depression | Drugs |  |
| venlafaxine 25 MG Oral Tablet                                                                                                                                                                                                                                  | 743718   | Antidepressant | Depression | Drugs |  |
| alanine 20.7 MG/ML / arginine 11.5 MG/ML / glycine 10.3 MG/ML / histidine 4.8 MG/ML / isoleucine 6 MG/ML / leucine 7.3 MG/ML / lysine 5.8 MG/ML / methionine 4 MG/ML / phenylalanine 5.6 MG/ML / proline 6.8 MG/ML / serine 5 MG/ML / threonine 4.2 MG/ML /... | 19131343 | Antidepressant | Depression | Drugs |  |
| vortioxetine 10 MG Oral Tablet [Trintellix]                                                                                                                                                                                                                    | 42629569 | Antidepressant | Depression | Drugs |  |
| trazodone hydrochloride 150 MG Oral Tablet [Desyre]                                                                                                                                                                                                            | 40163465 | Antidepressant | Depression | Drugs |  |
| vilazodone hydrochloride 40 MG Oral Tablet [Viibryd]                                                                                                                                                                                                           | 40234847 | Antidepressant | Depression | Drugs |  |
| vortioxetine 20 MG Oral Tablet [Trintellix]                                                                                                                                                                                                                    | 42629573 | Antidepressant | Depression | Drugs |  |
| doxepin hydrochloride 100 MG Oral Capsule                                                                                                                                                                                                                      | 40224885 | Antidepressant | Depression | Drugs |  |
| 12 HR bupropion hydrochloride 100 MG Extended Release Oral Tablet [Wellbutrin]                                                                                                                                                                                 | 40221858 | Antidepressant | Depression | Drugs |  |
| fluvoxamine                                                                                                                                                                                                                                                    | 751412   | Antidepressant | Depression | Drugs |  |
| vilazodone hydrochloride 20 MG Oral Tablet [Viibryd]                                                                                                                                                                                                           | 40234843 | Antidepressant | Depression | Drugs |  |
| amitriptyline hydrochloride 25 MG Oral Tablet [Endep]                                                                                                                                                                                                          | 40162719 | Antidepressant | Depression | Drugs |  |
| doxepin hydrochloride 50 MG Oral Capsule                                                                                                                                                                                                                       | 40224903 | Antidepressant | Depression | Drugs |  |
| desipramine hydrochloride 10 MG Oral Tablet                                                                                                                                                                                                                    | 40237418 | Antidepressant | Depression | Drugs |  |
| imipramine hydrochloride 25 MG Oral Tablet                                                                                                                                                                                                                     | 778296   | Antidepressant | Depression | Drugs |  |
| tranylcypromine 10 MG Oral Tablet [Parnate]                                                                                                                                                                                                                    | 19004820 | Antidepressant | Depression | Drugs |  |
| 24 HR venlafaxine 37.5 MG Extended Release Oral Capsule [Effexor]                                                                                                                                                                                              | 743795   | Antidepressant | Depression | Drugs |  |
| venlafaxine 50 MG Oral Tablet                                                                                                                                                                                                                                  | 743753   | Antidepressant | Depression | Drugs |  |
| { 7 (vilazodone hydrochloride 10 MG Oral Tablet [Viibryd]) / 7 (vilazodone hydrochloride 20 MG Oral Tablet [Viibryd]) / 16 (vilazodone hydrochloride 40 MG Oral Tablet [Viibryd]) } Pack [Viibryd 10/20/40 30 Day Pack]                                        | 40235110 | Antidepressant | Depression | Drugs |  |
| escitalopram 5 MG Oral Tablet [Lexapro]                                                                                                                                                                                                                        | 19102734 | Antidepressant | Depression | Drugs |  |
| phenelzine 15 MG Oral Tablet                                                                                                                                                                                                                                   | 733898   | Antidepressant | Depression | Drugs |  |
| 12 HR bupropion hydrochloride 150 MG Extended Release Oral Tablet [Budeprion]                                                                                                                                                                                  | 40221860 | Antidepressant | Depression | Drugs |  |
| nortriptyline 10 MG Oral Capsule [Aventyl]                                                                                                                                                                                                                     | 40239274 | Antidepressant | Depression | Drugs |  |
| amitriptyline hydrochloride 75 MG Oral Tablet                                                                                                                                                                                                                  | 40162737 | Antidepressant | Depression | Drugs |  |
| clomipramine hydrochloride 25 MG Oral Capsule                                                                                                                                                                                                                  | 40163063 | Antidepressant | Depression | Drugs |  |
| trimipramine 100 MG Oral Capsule                                                                                                                                                                                                                               | 705794   | Antidepressant | Depression | Drugs |  |
| mirtazapine 7.5 MG Oral Tablet                                                                                                                                                                                                                                 | 19112586 | Antidepressant | Depression | Drugs |  |
| doxepin hydrochloride 75 MG Oral Capsule                                                                                                                                                                                                                       | 40224915 | Antidepressant | Depression | Drugs |  |
| mirtazapine 15 MG Oral Tablet [Remeron]                                                                                                                                                                                                                        | 725172   | Antidepressant | Depression | Drugs |  |
| protriptyline hydrochloride 10 MG Oral Tablet                                                                                                                                                                                                                  | 40175376 | Antidepressant | Depression | Drugs |  |
| paroxetine hydrochloride 10 MG Oral Tablet                                                                                                                                                                                                                     | 35604569 | Antidepressant | Depression | Drugs |  |
| paroxetine mesylate 40 MG Oral Tablet [Pexeva]                                                                                                                                                                                                                 | 722153   | Antidepressant | Depression | Drugs |  |
| citalopram 40 MG Oral Tablet [Celexa]                                                                                                                                                                                                                          | 797620   | Antidepressant | Depression | Drugs |  |
| mirtazapine 30 MG Oral Tablet [Remeron]                                                                                                                                                                                                                        | 725173   | Antidepressant | Depression | Drugs |  |
| vilazodone hydrochloride 10 MG Oral Tablet [Viibryd]                                                                                                                                                                                                           | 40234839 | Antidepressant | Depression | Drugs |  |
| 12 HR bupropion hydrochloride 200 MG Extended Release Oral Tablet [Wellbutrin]                                                                                                                                                                                 | 40221866 | Antidepressant | Depression | Drugs |  |
| nortriptyline 50 MG Oral Capsule [Pamelor]                                                                                                                                                                                                                     | 19041194 | Antidepressant | Depression | Drugs |  |
| desvenlafaxine                                                                                                                                                                                                                                                 | 717607   | Antidepressant | Depression | Drugs |  |
| amitriptyline hydrochloride 50 MG Oral Tablet [Vanatrip]                                                                                                                                                                                                       | 40162732 | Antidepressant | Depression | Drugs |  |
| clomipramine                                                                                                                                                                                                                                                   | 798834   | Antidepressant | Depression | Drugs |  |
| doxepin hydrochloride 25 MG Oral Capsule [Sinequan]                                                                                                                                                                                                            | 40224899 | Antidepressant | Depression | Drugs |  |
| nefazodone hydrochloride 100 MG Oral Tablet                                                                                                                                                                                                                    | 40238415 | Antidepressant | Depression | Drugs |  |
| fluvoxamine maleate 50 MG Oral Tablet                                                                                                                                                                                                                          | 40174739 | Antidepressant | Depression | Drugs |  |
| desipramine                                                                                                                                                                                                                                                    | 716968   | Antidepressant | Depression | Drugs |  |
| nefazodone                                                                                                                                                                                                                                                     | 714684   | Antidepressant | Depression | Drugs |  |
| 24 HR paroxetine hydrochloride 25 MG Extended Release Oral Tablet                                                                                                                                                                                              | 35604759 | Antidepressant | Depression | Drugs |  |
| fluoxetine 10 MG Oral Capsule [Prozac]                                                                                                                                                                                                                         | 19029479 | Antidepressant | Depression | Drugs |  |
| 12 HR bupropion hydrochloride 90 MG / naltrexone hydrochloride 8 MG Extended Release Oral Tablet [Contrace]                                                                                                                                                    | 45774490 | Antidepressant | Depression | Drugs |  |
| duloxetine 40 MG Delayed Release Oral Capsule [Irenka]                                                                                                                                                                                                         | 46233914 | Antidepressant | Depression | Drugs |  |
| nefazodone hydrochloride 150 MG Oral Tablet                                                                                                                                                                                                                    | 40238419 | Antidepressant | Depression | Drugs |  |

|                                                                                                                                                                                                                                                                 |          |                |            |       |  |
|-----------------------------------------------------------------------------------------------------------------------------------------------------------------------------------------------------------------------------------------------------------------|----------|----------------|------------|-------|--|
| paroxetine hydrochloride 25 MG Extended Release Oral Tablet [Paxil]                                                                                                                                                                                             | 722159   | Antidepressant | Depression | Drugs |  |
| Smoking Cessation 12 HR bupropion hydrochloride 150 MG Extended Release Oral Tablet                                                                                                                                                                             | 36249641 | Antidepressant | Depression | Drugs |  |
| paroxetine mesylate 30 MG Oral Tablet [Pexeva]                                                                                                                                                                                                                  | 722152   | Antidepressant | Depression | Drugs |  |
| 24 HR paroxetine hydrochloride 12.5 MG Extended Release Oral Tablet [Paxil]                                                                                                                                                                                     | 35604758 | Antidepressant | Depression | Drugs |  |
| paroxetine mesylate 20 MG Oral Tablet [Pexeva]                                                                                                                                                                                                                  | 722121   | Antidepressant | Depression | Drugs |  |
| desipramine hydrochloride 25 MG Oral Tablet                                                                                                                                                                                                                     | 40237432 | Antidepressant | Depression | Drugs |  |
| imipramine hydrochloride 50 MG Oral Tablet                                                                                                                                                                                                                      | 778299   | Antidepressant | Depression | Drugs |  |
| 24 HR venlafaxine 75 MG Extended Release Oral Tablet                                                                                                                                                                                                            | 19132563 | Antidepressant | Depression | Drugs |  |
| 24 HR desvenlafaxine succinate 50 MG Extended Release Oral Tablet [Pristiq]                                                                                                                                                                                     | 19129683 | Antidepressant | Depression | Drugs |  |
| fluoxetine 60 MG Oral Tablet                                                                                                                                                                                                                                    | 40243919 | Antidepressant | Depression | Drugs |  |
| nefazodone hydrochloride 200 MG Oral Tablet                                                                                                                                                                                                                     | 40238423 | Antidepressant | Depression | Drugs |  |
| paroxetine hydrochloride 20 MG Oral Tablet [Paxil]                                                                                                                                                                                                              | 19035312 | Antidepressant | Depression | Drugs |  |
| fluvoxamine maleate 50 MG Oral Tablet [Luvox]                                                                                                                                                                                                                   | 40174740 | Antidepressant | Depression | Drugs |  |
| protriptyline hydrochloride 5 MG Oral Tablet                                                                                                                                                                                                                    | 40175380 | Antidepressant | Depression | Drugs |  |
| fluoxetine 20 MG Oral Capsule [Prozac]                                                                                                                                                                                                                          | 19004895 | Antidepressant | Depression | Drugs |  |
| vortioxetine 10 MG Oral Tablet                                                                                                                                                                                                                                  | 44506611 | Antidepressant | Depression | Drugs |  |
| tranylcypromine 10 MG Oral Tablet                                                                                                                                                                                                                               | 703544   | Antidepressant | Depression | Drugs |  |
| nortriptyline 25 MG Oral Capsule [Aventyl]                                                                                                                                                                                                                      | 40239277 | Antidepressant | Depression | Drugs |  |
| sertraline 20 MG/ML Oral Solution                                                                                                                                                                                                                               | 40165282 | Antidepressant | Depression | Drugs |  |
| fluoxetine 10 MG Oral Capsule [Selfemra]                                                                                                                                                                                                                        | 19130449 | Antidepressant | Depression | Drugs |  |
| 12 HR bupropion hydrochloride 150 MG Extended Release Oral Tablet [Wellbutrin]                                                                                                                                                                                  | 40221862 | Antidepressant | Depression | Drugs |  |
| phenelzine                                                                                                                                                                                                                                                      | 733896   | Antidepressant | Depression | Drugs |  |
| desipramine hydrochloride 75 MG Oral Tablet                                                                                                                                                                                                                     | 40237445 | Antidepressant | Depression | Drugs |  |
| 24 HR venlafaxine 37.5 MG Extended Release Oral Tablet                                                                                                                                                                                                          | 19132562 | Antidepressant | Depression | Drugs |  |
| PMDD fluoxetine 20 MG Oral Tablet [Sarafem]                                                                                                                                                                                                                     | 755854   | Antidepressant | Depression | Drugs |  |
| 24 HR desvenlafaxine succinate 50 MG Extended Release Oral Tablet                                                                                                                                                                                               | 1593112  | Antidepressant | Depression | Drugs |  |
| 24 HR desvenlafaxine 100 MG Extended Release Oral Tablet [Khedeza]                                                                                                                                                                                              | 43559999 | Antidepressant | Depression | Drugs |  |
| escitalopram 1 MG/ML Oral Solution                                                                                                                                                                                                                              | 715964   | Antidepressant | Depression | Drugs |  |
| mirtazapine 15 MG Disintegrating Oral Tablet [Remeron]                                                                                                                                                                                                          | 725206   | Antidepressant | Depression | Drugs |  |
| amitriptyline hydrochloride 150 MG Oral Tablet                                                                                                                                                                                                                  | 40162695 | Antidepressant | Depression | Drugs |  |
| alanine 12.8 MG/ML / arginine 9.8 MG/ML / glycine 12.8 MG/ML / histidine 3 MG/ML / isoleucine 7.2 MG/ML / leucine 9.4 MG/ML / lysine 7.2 MG/ML / methionine 4 MG/ML / phenylalanine 4.4 MG/ML / proline 8.6 MG/ML / serine 4.2 MG/ML / threonine 5.2 MG/ML /... | 19133483 | Antidepressant | Depression | Drugs |  |
| bupropion hydrochloride 75 MG Oral Tablet [Wellbutrin]                                                                                                                                                                                                          | 40222093 | Antidepressant | Depression | Drugs |  |
| doxepin hydrochloride 50 MG/ML Topical Cream                                                                                                                                                                                                                    | 40224909 | Antidepressant | Depression | Drugs |  |
| amoxapine 25 MG Oral Tablet                                                                                                                                                                                                                                     | 713132   | Antidepressant | Depression | Drugs |  |
| 24 HR desvenlafaxine succinate 25 MG Extended Release Oral Tablet                                                                                                                                                                                               | 46221214 | Antidepressant | Depression | Drugs |  |
| bupropion hydrochloride 100 MG Oral Tablet [Wellbutrin]                                                                                                                                                                                                         | 40222061 | Antidepressant | Depression | Drugs |  |
| doxepin hydrochloride 75 MG Oral Capsule [Sinequan]                                                                                                                                                                                                             | 40224917 | Antidepressant | Depression | Drugs |  |
| venlafaxine 75 MG Oral Tablet [Effexor]                                                                                                                                                                                                                         | 19039822 | Antidepressant | Depression | Drugs |  |
| paroxetine hydrochloride 10 MG Oral Tablet [Paxil]                                                                                                                                                                                                              | 722064   | Antidepressant | Depression | Drugs |  |
| alanine 10.4 MG/ML / arginine 5.75 MG/ML / calcium chloride 0.004 MEQ/ML / dibasic potassium phosphate 2.61 MG/ML / glucose 150 MG/ML / glycine 5.15 MG/ML / histidine 2.4 MG/ML / isoleucine 3 MG/ML / leucine 3.65 MG/ML / lysine 2.9 MG/ML / magnesium ch... | 19131082 | Antidepressant | Depression | Drugs |  |
| maprotiline hydrochloride 25 MG Oral Tablet                                                                                                                                                                                                                     | 42800984 | Antidepressant | Depression | Drugs |  |
| protriptyline hydrochloride 5 MG Oral Tablet [Vivactil]                                                                                                                                                                                                         | 40175381 | Antidepressant | Depression | Drugs |  |
| imipramine hydrochloride 25 MG Oral Tablet [Tofranil]                                                                                                                                                                                                           | 778297   | Antidepressant | Depression | Drugs |  |
| mirtazapine 45 MG Oral Tablet [Remeron]                                                                                                                                                                                                                         | 725174   | Antidepressant | Depression | Drugs |  |
| 24 HR desvenlafaxine 50 MG Extended Release Oral Tablet [Khedeza]                                                                                                                                                                                               | 43560000 | Antidepressant | Depression | Drugs |  |
| imipramine hydrochloride 10 MG Oral Tablet [Tofranil]                                                                                                                                                                                                           | 778359   | Antidepressant | Depression | Drugs |  |
| imipramine hydrochloride 10 MG Oral Tablet                                                                                                                                                                                                                      | 778357   | Antidepressant | Depression | Drugs |  |
| doxepin 3 MG Oral Tablet [Silenor]                                                                                                                                                                                                                              | 40173385 | Antidepressant | Depression | Drugs |  |
| imipramine hydrochloride 50 MG Oral Tablet [Tofranil]                                                                                                                                                                                                           | 19134040 | Antidepressant | Depression | Drugs |  |
| doxepin hydrochloride 50 MG Oral Capsule [Sinequan]                                                                                                                                                                                                             | 40224905 | Antidepressant | Depression | Drugs |  |
| milnacipran hydrochloride 100 MG Oral Tablet [Savella]                                                                                                                                                                                                          | 19080251 | Antidepressant | Depression | Drugs |  |
| 24 HR bupropion hydrochloride 150 MG Extended Release Oral Tablet [Budeprion]                                                                                                                                                                                   | 40221872 | Antidepressant | Depression | Drugs |  |
| 24 HR desvenlafaxine succinate 25 MG Extended Release Oral Tablet [Pristiq]                                                                                                                                                                                     | 46221216 | Antidepressant | Depression | Drugs |  |
| paroxetine mesylate 10 MG Oral Tablet [Pexeva]                                                                                                                                                                                                                  | 19113754 | Antidepressant | Depression | Drugs |  |
| 24 HR fluvoxamine maleate 150 MG Extended Release Oral Capsule                                                                                                                                                                                                  | 40173466 | Antidepressant | Depression | Drugs |  |
| amitriptyline hydrochloride 75 MG Oral Tablet [Endep]                                                                                                                                                                                                           | 40162739 | Antidepressant | Depression | Drugs |  |
| 24 HR desvenlafaxine 100 MG Extended Release Oral Tablet                                                                                                                                                                                                        | 19129664 | Antidepressant | Depression | Drugs |  |
| amitriptyline hydrochloride 100 MG Oral Tablet [Endep]                                                                                                                                                                                                          | 40162685 | Antidepressant | Depression | Drugs |  |
| citalopram 2 MG/ML Oral Solution                                                                                                                                                                                                                                | 19075393 | Antidepressant | Depression | Drugs |  |
| doxepin hydrochloride 150 MG Oral Capsule [Sinequan]                                                                                                                                                                                                            | 40224893 | Antidepressant | Depression | Drugs |  |
| vortioxetine 5 MG Oral Tablet [Trintellix]                                                                                                                                                                                                                      | 42629575 | Antidepressant | Depression | Drugs |  |
| duloxetine 40 MG Delayed Release Oral Capsule                                                                                                                                                                                                                   | 19123437 | Antidepressant | Depression | Drugs |  |
| 24 HR bupropion hydrochloride 450 MG Extended Release Oral Tablet [Forfivo]                                                                                                                                                                                     | 42707260 | Antidepressant | Depression | Drugs |  |
| alanine 8.8 MG/ML / arginine 4.89 MG/ML / calcium chloride 0.004 MEQ/ML / dibasic potassium phosphate 2.61 MG/ML / glucose 50 MG/ML / glycine 4.38 MG/ML / histidine 2.04 MG/ML / isoleucine 2.55 MG/ML / leucine 3.11 MG/ML / lysine 2.47 MG/ML / magnesium... | 19131065 | Antidepressant | Depression | Drugs |  |

|                                                                                                                                                                                                                                                                  |          |                |            |       |  |
|------------------------------------------------------------------------------------------------------------------------------------------------------------------------------------------------------------------------------------------------------------------|----------|----------------|------------|-------|--|
| bupropion hydrochloride 150 MG Extended Release Oral Tablet                                                                                                                                                                                                      | 40222065 | Antidepressant | Depression | Drugs |  |
| PMDD fluoxetine 10 MG Oral Tablet [Sarafem]                                                                                                                                                                                                                      | 755853   | Antidepressant | Depression | Drugs |  |
| paroxetine hydrochloride 12.5 MG Extended Release Oral Tablet [Paxil]                                                                                                                                                                                            | 722158   | Antidepressant | Depression | Drugs |  |
| amitriptyline hydrochloride 25 MG / perphenazine 2 MG Oral Tablet                                                                                                                                                                                                | 40162704 | Antidepressant | Depression | Drugs |  |
| doxepin hydrochloride 10 MG/ML Oral Solution                                                                                                                                                                                                                     | 40224881 | Antidepressant | Depression | Drugs |  |
| doxepin 3 MG Oral Tablet                                                                                                                                                                                                                                         | 40173384 | Antidepressant | Depression | Drugs |  |
| paroxetine hydrochloride 37.5 MG Extended Release Oral Tablet [Paxil]                                                                                                                                                                                            | 722160   | Antidepressant | Depression | Drugs |  |
| paroxetine hydrochloride 30 MG Oral Tablet [Paxil]                                                                                                                                                                                                               | 19035313 | Antidepressant | Depression | Drugs |  |
| bupropion hydrochloride 300 MG Extended Release Oral Tablet                                                                                                                                                                                                      | 40222084 | Antidepressant | Depression | Drugs |  |
| amitriptyline hydrochloride 50 MG Oral Tablet [Domical]                                                                                                                                                                                                          | 19025666 | Antidepressant | Depression | Drugs |  |
| 24 HR desvenlafaxine 50 MG Extended Release Oral Tablet                                                                                                                                                                                                          | 19129681 | Antidepressant | Depression | Drugs |  |
| 12 HR bupropion hydrochloride 90 MG / naltrexone hydrochloride 8 MG Extended Release Oral Tablet                                                                                                                                                                 | 45774486 | Antidepressant | Depression | Drugs |  |
| amitriptyline hydrochloride 10 MG / perphenazine 2 MG Oral Tablet                                                                                                                                                                                                | 40162658 | Antidepressant | Depression | Drugs |  |
| nortriptyline 75 MG Oral Capsule [Pamelor]                                                                                                                                                                                                                       | 19041328 | Antidepressant | Depression | Drugs |  |
| amitriptyline hydrochloride 25 MG Oral Tablet [Elavil]                                                                                                                                                                                                           | 40162718 | Antidepressant | Depression | Drugs |  |
| alanine 8.8 MG/ML / arginine 4.89 MG/ML / calcium chloride 0.004 MEQ/ML / dibasic potassium phosphate 2.61 MG/ML / glucose 100 MG/ML / glycine 4.38 MG/ML / histidine 2.04 MG/ML / isoleucine 2.55 MG/ML / leucine 3.11 MG/ML / lysine 2.47 MG/ML / magnesi...   | 40235428 | Antidepressant | Depression | Drugs |  |
| {3 (0.2 ML) (esketamine 140 MG/ML Nasal Spray [Spravato]) } Pack [Spravato 84 MG Dose Kit]                                                                                                                                                                       | 1366735  | Antidepressant | Depression | Drugs |  |
| alanine 10.4 MG/ML / arginine 5.75 MG/ML / glucose 200 MG/ML / glycine 5.15 MG/ML / histidine 2.4 MG/ML / isoleucine 3 MG/ML / leucine 3.65 MG/ML / lysine 2.9 MG/ML / methionine 2 MG/ML / phenylalanine 2.8 MG/ML / proline 3.4 MG/ML / serine 2.5 MG/ML / ... | 19130815 | Antidepressant | Depression | Drugs |  |
| venlafaxine 25 MG Oral Tablet [Effexor]                                                                                                                                                                                                                          | 19039818 | Antidepressant | Depression | Drugs |  |
| 24 HR paroxetine hydrochloride 37.5 MG Extended Release Oral Tablet                                                                                                                                                                                              | 35604761 | Antidepressant | Depression | Drugs |  |
| doxepin 6 MG Oral Tablet                                                                                                                                                                                                                                         | 40173388 | Antidepressant | Depression | Drugs |  |
| bupropion hydrochloride 100 MG Extended Release Oral Tablet                                                                                                                                                                                                      | 40222057 | Antidepressant | Depression | Drugs |  |
| amitriptyline hydrochloride 50 MG Oral Tablet [Endep]                                                                                                                                                                                                            | 40162731 | Antidepressant | Depression | Drugs |  |
| milnacipran hydrochloride 25 MG Oral Tablet [Savella]                                                                                                                                                                                                            | 19080258 | Antidepressant | Depression | Drugs |  |
| duloxetine hydrochloride 60 MG Extended Release Oral Capsule                                                                                                                                                                                                     | 715292   | Antidepressant | Depression | Drugs |  |
| mirtazapine 30 MG Disintegrating Oral Tablet                                                                                                                                                                                                                     | 19070748 | Antidepressant | Depression | Drugs |  |
| paroxetine mesylate 7.5 MG Oral Capsule [Brisdelle]                                                                                                                                                                                                              | 43532895 | Antidepressant | Depression | Drugs |  |
| amoxapine                                                                                                                                                                                                                                                        | 713109   | Antidepressant | Depression | Drugs |  |
| 24 HR bupropion hydrochloride 450 MG Extended Release Oral Tablet                                                                                                                                                                                                | 42707259 | Antidepressant | Depression | Drugs |  |
| 12 HR bupropion hydrochloride 100 MG Extended Release Oral Tablet [Budeprion]                                                                                                                                                                                    | 40221857 | Antidepressant | Depression | Drugs |  |
| nefazodone hydrochloride 150 MG Oral Tablet [Serzone]                                                                                                                                                                                                            | 40238420 | Antidepressant | Depression | Drugs |  |
| paroxetine hydrochloride 40 MG Oral Tablet [Paxil]                                                                                                                                                                                                               | 19046308 | Antidepressant | Depression | Drugs |  |
| paroxetine mesylate 7.5 MG Oral Capsule                                                                                                                                                                                                                          | 43532894 | Antidepressant | Depression | Drugs |  |
| vortioxetine                                                                                                                                                                                                                                                     | 44507700 | Antidepressant | Depression | Drugs |  |
| imipramine pamoate 75 MG Oral Capsule                                                                                                                                                                                                                            | 778322   | Antidepressant | Depression | Drugs |  |
| nortriptyline 25 MG Oral Capsule [Pamelor]                                                                                                                                                                                                                       | 19041175 | Antidepressant | Depression | Drugs |  |
| 24 HR bupropion hydrochloride 300 MG Extended Release Oral Tablet [Budeprion]                                                                                                                                                                                    | 40221875 | Antidepressant | Depression | Drugs |  |
| Sprinkle duloxetine 60 MG Delayed Release Oral Capsule                                                                                                                                                                                                           | 37496767 | Antidepressant | Depression | Drugs |  |
| doxepin 6 MG Oral Tablet [Silenor]                                                                                                                                                                                                                               | 40173389 | Antidepressant | Depression | Drugs |  |
| amoxapine 50 MG Oral Tablet                                                                                                                                                                                                                                      | 713133   | Antidepressant | Depression | Drugs |  |
| 24 HR bupropion hydrobromide 522 MG Extended Release Oral Tablet [Aplenzin]                                                                                                                                                                                      | 40221882 | Antidepressant | Depression | Drugs |  |
| doxepin hydrochloride 100 MG Oral Capsule [Sinequan]                                                                                                                                                                                                             | 40224887 | Antidepressant | Depression | Drugs |  |
| trazodone hydrochloride 300 MG Oral Tablet [Desyrel]                                                                                                                                                                                                             | 40163469 | Antidepressant | Depression | Drugs |  |
| milnacipran hydrochloride 25 MG Oral Tablet                                                                                                                                                                                                                      | 19080257 | Antidepressant | Depression | Drugs |  |
| {5 (milnacipran hydrochloride 12.5 MG Oral Tablet) / 8 (milnacipran hydrochloride 25 MG Oral Tablet) / 42 (milnacipran hydrochloride 50 MG Oral Tablet) } Pack                                                                                                   | 19133788 | Antidepressant | Depression | Drugs |  |
| vortioxetine 5 MG Oral Tablet                                                                                                                                                                                                                                    | 44506613 | Antidepressant | Depression | Drugs |  |
| amitriptyline hydrochloride 25 MG Oral Tablet [Domical]                                                                                                                                                                                                          | 19025664 | Antidepressant | Depression | Drugs |  |
| clomipramine hydrochloride 75 MG Oral Capsule                                                                                                                                                                                                                    | 40163076 | Antidepressant | Depression | Drugs |  |
| PMDD fluoxetine 20 MG Oral Tablet                                                                                                                                                                                                                                | 740118   | Antidepressant | Depression | Drugs |  |
| 24 HR paroxetine hydrochloride 25 MG Extended Release Oral Tablet [Paxil]                                                                                                                                                                                        | 35604760 | Antidepressant | Depression | Drugs |  |
| phenelzine 15 MG Oral Tablet [Nardil]                                                                                                                                                                                                                            | 19004818 | Antidepressant | Depression | Drugs |  |
| alanine 21.7 MG/ML / arginine 14.7 MG/ML / aspartate 4.34 MG/ML / glutamate 7.49 MG/ML / glycine 10.4 MG/ML / histidine 8.94 MG/ML / isoleucine 7.49 MG/ML / leucine 10.4 MG/ML / lysine 11.8 MG/ML / methionine 7.49 MG/ML / phenylalanine 10.4 MG/ML / pro...  | 19130883 | Antidepressant | Depression | Drugs |  |
| bupropion hydrochloride 300 MG Extended Release Oral Tablet [Budeprion]                                                                                                                                                                                          | 40222085 | Antidepressant | Depression | Drugs |  |
| desipramine hydrochloride 150 MG Oral Tablet [Norpramin]                                                                                                                                                                                                         | 40237429 | Antidepressant | Depression | Drugs |  |
| escitalopram 1 MG/ML Oral Solution [Lexapro]                                                                                                                                                                                                                     | 19102744 | Antidepressant | Depression | Drugs |  |
| desipramine hydrochloride 150 MG Oral Tablet                                                                                                                                                                                                                     | 40237428 | Antidepressant | Depression | Drugs |  |
| {5 (milnacipran hydrochloride 12.5 MG Oral Tablet [Savella]) / 8 (milnacipran hydrochloride 25 MG Oral Tablet [Savella]) / 42 (milnacipran hydrochloride 50 MG Oral Tablet [Savella]) } Pack [Savella 4-Week Titration]                                          | 19133789 | Antidepressant | Depression | Drugs |  |
| 24 HR trazodone hydrochloride 150 MG Extended Release Oral Tablet                                                                                                                                                                                                | 40171493 | Antidepressant | Depression | Drugs |  |
| clomipramine hydrochloride 75 MG Oral Capsule [Anafranil]                                                                                                                                                                                                        | 40163077 | Antidepressant | Depression | Drugs |  |
| desipramine hydrochloride 100 MG Oral Tablet [Norpramin]                                                                                                                                                                                                         | 40237423 | Antidepressant | Depression | Drugs |  |
| desipramine hydrochloride 25 MG Oral Tablet [Pertofrane]                                                                                                                                                                                                         | 40237434 | Antidepressant | Depression | Drugs |  |

|                                                                                                                                                                                                                                                                 |          |                |            |       |
|-----------------------------------------------------------------------------------------------------------------------------------------------------------------------------------------------------------------------------------------------------------------|----------|----------------|------------|-------|
| doxepin hydrochloride 50 MG/ML Topical Cream [Zonalon]                                                                                                                                                                                                          | 40224911 | Antidepressant | Depression | Drugs |
| 5-hydroxytryptophan                                                                                                                                                                                                                                             | 1363516  | Antidepressant | Depression | Drugs |
| clomipramine hydrochloride 50 MG Oral Capsule [Anafranil]                                                                                                                                                                                                       | 40163071 | Antidepressant | Depression | Drugs |
| amitriptyline hydrochloride 50 MG Oral Tablet [Elavil]                                                                                                                                                                                                          | 40162730 | Antidepressant | Depression | Drugs |
| vilazodone hydrochloride 40 MG Oral Tablet                                                                                                                                                                                                                      | 40234846 | Antidepressant | Depression | Drugs |
| venlafaxine 50 MG Oral Tablet [Effexor]                                                                                                                                                                                                                         | 19039820 | Antidepressant | Depression | Drugs |
| nortriptyline 2 MG/ML Oral Solution                                                                                                                                                                                                                             | 19079114 | Antidepressant | Depression | Drugs |
| fluoxetine 4 MG/ML Oral Solution [Prozac]                                                                                                                                                                                                                       | 19004896 | Antidepressant | Depression | Drugs |
| imipramine pamoate 100 MG Oral Capsule                                                                                                                                                                                                                          | 778355   | Antidepressant | Depression | Drugs |
| 24 HR trazodone hydrochloride 300 MG Extended Release Oral Tablet                                                                                                                                                                                               | 40171495 | Antidepressant | Depression | Drugs |
| vortioxetine 10 MG Oral Tablet [Brintellix]                                                                                                                                                                                                                     | 44506623 | Antidepressant | Depression | Drugs |
| nefazodone hydrochloride 250 MG Oral Tablet                                                                                                                                                                                                                     | 40238429 | Antidepressant | Depression | Drugs |
| 24 HR fluvoxamine maleate 100 MG Extended Release Oral Capsule [Luvox]                                                                                                                                                                                          | 40173465 | Antidepressant | Depression | Drugs |
| amitriptyline hydrochloride 150 MG Oral Tablet [Enderp]                                                                                                                                                                                                         | 40162697 | Antidepressant | Depression | Drugs |
| amitriptyline hydrochloride 12.5 MG / chlordiazepoxide 5 MG Oral Tablet                                                                                                                                                                                         | 40162691 | Antidepressant | Depression | Drugs |
| Smoking Cessation 12 HR bupropion hydrochloride 150 MG Extended Release Oral Tablet [Buproban]                                                                                                                                                                  | 40221861 | Antidepressant | Depression | Drugs |
| alanine 11 MG/ML / arginine 8.5 MG/ML / glycine 11 MG/ML / histidine 2.6 MG/ML / isoleucine 6.2 MG/ML / leucine 8.1 MG/ML / lysine 6.24 MG/ML / methionine 3.4 MG/ML / phenylalanine 3.8 MG/ML / proline 7.5 MG/ML / serine 3.7 MG/ML / threonine 4.6 MG/ML...  | 19133498 | Antidepressant | Depression | Drugs |
| desipramine hydrochloride 25 MG Oral Tablet [Norpramin]                                                                                                                                                                                                         | 40237433 | Antidepressant | Depression | Drugs |
| milnacipran hydrochloride 50 MG Oral Tablet                                                                                                                                                                                                                     | 19080255 | Antidepressant | Depression | Drugs |
| vilazodone hydrochloride 20 MG Oral Tablet                                                                                                                                                                                                                      | 40234842 | Antidepressant | Depression | Drugs |
| nefazodone hydrochloride 50 MG Oral Tablet                                                                                                                                                                                                                      | 40238435 | Antidepressant | Depression | Drugs |
| desipramine hydrochloride 10 MG Oral Tablet [Norpramin]                                                                                                                                                                                                         | 40237419 | Antidepressant | Depression | Drugs |
| {3 (0.2 ML) (esketamine 140 MG/ML Nasal Spray) } Pack                                                                                                                                                                                                           | 1366734  | Antidepressant | Depression | Drugs |
| paroxetine hydrochloride 2 MG/ML Oral Suspension [Paxil]                                                                                                                                                                                                        | 722066   | Antidepressant | Depression | Drugs |
| fluoxetine 90 MG Delayed Release Oral Capsule                                                                                                                                                                                                                   | 755741   | Antidepressant | Depression | Drugs |
| mirtazapine 30 MG Disintegrating Oral Tablet [Remeron]                                                                                                                                                                                                          | 19128280 | Antidepressant | Depression | Drugs |
| vortioxetine 5 MG Oral Tablet [Brintellix]                                                                                                                                                                                                                      | 44506616 | Antidepressant | Depression | Drugs |
| fluoxetine 50 MG / olanzapine 12 MG Oral Capsule                                                                                                                                                                                                                | 19102554 | Antidepressant | Depression | Drugs |
| milnacipran hydrochloride 100 MG Oral Tablet                                                                                                                                                                                                                    | 19080230 | Antidepressant | Depression | Drugs |
| paroxetine mesylate 10 MG Oral Tablet                                                                                                                                                                                                                           | 35604589 | Antidepressant | Depression | Drugs |
| bupropion hydrochloride 200 MG Extended Release Oral Tablet                                                                                                                                                                                                     | 40222075 | Antidepressant | Depression | Drugs |
| 24 HR trazodone hydrochloride 300 MG Extended Release Oral Tablet [Olepro]                                                                                                                                                                                      | 40171496 | Antidepressant | Depression | Drugs |
| paroxetine hydrochloride 2 MG/ML Oral Suspension                                                                                                                                                                                                                | 722068   | Antidepressant | Depression | Drugs |
| mirtazapine 45 MG Disintegrating Oral Tablet [Remeron]                                                                                                                                                                                                          | 725208   | Antidepressant | Depression | Drugs |
| vortioxetine 20 MG Oral Tablet [Brintellix]                                                                                                                                                                                                                     | 44506620 | Antidepressant | Depression | Drugs |
| imipramine pamoate 100 MG Oral Capsule [Tofranil-PM]                                                                                                                                                                                                            | 778360   | Antidepressant | Depression | Drugs |
| doxepin hydrochloride 10 MG/ML Oral Solution [Sinequan]                                                                                                                                                                                                         | 40224882 | Antidepressant | Depression | Drugs |
| {7 (vilazodone hydrochloride 10 MG Oral Tablet [Viibryd]) / 23 (vilazodone hydrochloride 20 MG Oral Tablet [Viibryd]) } Pack [Viibryd Starter Pack 10/20 30 Day Pack]                                                                                           | 46234549 | Antidepressant | Depression | Drugs |
| desipramine hydrochloride 50 MG Oral Tablet [Norpramin]                                                                                                                                                                                                         | 40237442 | Antidepressant | Depression | Drugs |
| fluoxetine 50 MG / olanzapine 6 MG Oral Capsule                                                                                                                                                                                                                 | 19102555 | Antidepressant | Depression | Drugs |
| tryptophan 500 MG Oral Capsule                                                                                                                                                                                                                                  | 19022489 | Antidepressant | Depression | Drugs |
| nefazodone hydrochloride 100 MG Oral Tablet [Serzone]                                                                                                                                                                                                           | 40238416 | Antidepressant | Depression | Drugs |
| sertraline 20 MG/ML Oral Solution [Zoloft]                                                                                                                                                                                                                      | 40165283 | Antidepressant | Depression | Drugs |
| citalopram 2 MG/ML Oral Solution [Celexa]                                                                                                                                                                                                                       | 797621   | Antidepressant | Depression | Drugs |
| {2 (0.2 ML) (esketamine 140 MG/ML Nasal Spray [Spravato]) } Pack [Spravato 56 MG Dose Kit]                                                                                                                                                                      | 1366737  | Antidepressant | Depression | Drugs |
| 24 HR fluvoxamine maleate 100 MG Extended Release Oral Capsule                                                                                                                                                                                                  | 40173459 | Antidepressant | Depression | Drugs |
| 24 HR bupropion hydrobromide 348 MG Extended Release Oral Tablet                                                                                                                                                                                                | 40221879 | Antidepressant | Depression | Drugs |
| bupropion hydrochloride 150 MG Extended Release Oral Tablet [Zyban]                                                                                                                                                                                             | 40222069 | Antidepressant | Depression | Drugs |
| vilazodone hydrochloride 10 MG Oral Tablet                                                                                                                                                                                                                      | 40234838 | Antidepressant | Depression | Drugs |
| milnacipran hydrochloride 12.5 MG Oral Tablet [Savella]                                                                                                                                                                                                         | 19080254 | Antidepressant | Depression | Drugs |
| amoxapine 100 MG Oral Tablet                                                                                                                                                                                                                                    | 713110   | Antidepressant | Depression | Drugs |
| alanine 7.1 MG/ML / arginine 9.5 MG/ML / cysteine 0.16 MG/ML / glycine 14 MG/ML / histidine 2.8 MG/ML / isoleucine 6.9 MG/ML / leucine 9.1 MG/ML / lysine 7.3 MG/ML / methionine 5.3 MG/ML / phenylalanine 5.6 MG/ML / phosphoric acid 1.2 MG/ML / proline 1... | 40227648 | Antidepressant | Depression | Drugs |
| protriptyline                                                                                                                                                                                                                                                   | 754270   | Antidepressant | Depression | Drugs |
| paroxetine mesylate 20 MG Oral Tablet                                                                                                                                                                                                                           | 35604702 | Antidepressant | Depression | Drugs |
| clomipramine hydrochloride 25 MG Oral Capsule [Anafranil]                                                                                                                                                                                                       | 40163064 | Antidepressant | Depression | Drugs |
| imipramine pamoate 150 MG Oral Capsule                                                                                                                                                                                                                          | 778325   | Antidepressant | Depression | Drugs |
| fluvoxamine maleate 25 MG Oral Tablet [Luvox]                                                                                                                                                                                                                   | 40174736 | Antidepressant | Depression | Drugs |
| bupropion hydrochloride 150 MG Extended Release Oral Tablet [Wellbutrin]                                                                                                                                                                                        | 40222068 | Antidepressant | Depression | Drugs |
| venlafaxine 37.5 MG Extended Release Oral Tablet                                                                                                                                                                                                                | 743760   | Antidepressant | Depression | Drugs |
| paroxetine hydrochloride 12.5 MG Extended Release Oral Tablet                                                                                                                                                                                                   | 19115249 | Antidepressant | Depression | Drugs |
| fluoxetine 90 MG Delayed Release Oral Capsule [Prozac]                                                                                                                                                                                                          | 19122226 | Antidepressant | Depression | Drugs |
| tranylcypromine                                                                                                                                                                                                                                                 | 703470   | Antidepressant | Depression | Drugs |
| nefazodone hydrochloride 250 MG Oral Tablet [Serzone]                                                                                                                                                                                                           | 40238430 | Antidepressant | Depression | Drugs |
| nortriptyline 10 MG Oral Capsule [Pamelor]                                                                                                                                                                                                                      | 19041173 | Antidepressant | Depression | Drugs |

|                                                                                                                                                                                                                                                                 |          |                |            |       |
|-----------------------------------------------------------------------------------------------------------------------------------------------------------------------------------------------------------------------------------------------------------------|----------|----------------|------------|-------|
| alanine 10.4 MG/ML / arginine 5.75 MG/ML / glucose 150 MG/ML / glycine 5.15 MG/ML / histidine 2.4 MG/ML / isoleucine 3 MG/ML / leucine 3.65 MG/ML / lysine 2.9 MG/ML / methionine 2 MG/ML / phenylalanine 2.8 MG/ML / proline 3.4 MG/ML / serine 2.5 MG/ML /... | 19130811 | Antidepressant | Depression | Drugs |
| amitriptyline hydrochloride 100 MG Oral Tablet [Elavil]                                                                                                                                                                                                         | 40162684 | Antidepressant | Depression | Drugs |
| fluoxetine 25 MG / olanzapine 6 MG Oral Capsule                                                                                                                                                                                                                 | 19102552 | Antidepressant | Depression | Drugs |
| 24 HR bupropion hydrobromide 348 MG Extended Release Oral Tablet [Aplenzin]                                                                                                                                                                                     | 40221880 | Antidepressant | Depression | Drugs |
| amoxapine 150 MG Oral Tablet                                                                                                                                                                                                                                    | 713111   | Antidepressant | Depression | Drugs |
| doxepin hydrochloride 100 MG Oral Capsule [Adapin]                                                                                                                                                                                                              | 40224886 | Antidepressant | Depression | Drugs |
| alanine 8.8 MG/ML / arginine 4.89 MG/ML / glucose 250 MG/ML / glycine 4.38 MG/ML / histidine 2.04 MG/ML / isoleucine 2.55 MG/ML / leucine 3.11 MG/ML / lysine 2.47 MG/ML / methionine 1.7 MG/ML / phenylalanine 2.38 MG/ML / proline 2.89 MG/ML / serine 2.1... | 19130792 | Antidepressant | Depression | Drugs |
| doxepin hydrochloride 50 MG/ML Topical Cream [Prudoxin]                                                                                                                                                                                                         | 40224910 | Antidepressant | Depression | Drugs |
| paroxetine hydrochloride 37.5 MG Extended Release Oral Tablet                                                                                                                                                                                                   | 722157   | Antidepressant | Depression | Drugs |
| maprotiline                                                                                                                                                                                                                                                     | 794147   | Antidepressant | Depression | Drugs |
| maprotiline hydrochloride 50 MG Oral Tablet [Ludiomil]                                                                                                                                                                                                          | 42800989 | Antidepressant | Depression | Drugs |
| nefazodone hydrochloride 300 MG Oral Tablet                                                                                                                                                                                                                     | 40238433 | Antidepressant | Depression | Drugs |
| nortriptyline 2 MG/ML Oral Solution [Aventyl]                                                                                                                                                                                                                   | 40239275 | Antidepressant | Depression | Drugs |
| amitriptyline hydrochloride 10 MG/ML Injectable Solution [Elavil]                                                                                                                                                                                               | 40162679 | Antidepressant | Depression | Drugs |
| fluoxetine 10 MG Oral Capsule [Sarafem]                                                                                                                                                                                                                         | 755821   | Antidepressant | Depression | Drugs |
| fluoxetine 20 MG Oral Capsule [Sarafem]                                                                                                                                                                                                                         | 755852   | Antidepressant | Depression | Drugs |
| PMDD fluoxetine 15 MG Oral Tablet                                                                                                                                                                                                                               | 19131597 | Antidepressant | Depression | Drugs |
| fluoxetine 10 MG Oral Tablet [Prozac]                                                                                                                                                                                                                           | 755734   | Antidepressant | Depression | Drugs |
| trimipramine 25 MG Oral Capsule [Surmontil]                                                                                                                                                                                                                     | 19039155 | Antidepressant | Depression | Drugs |
| amitriptyline hydrochloride 50 MG / perphenazine 4 MG Oral Tablet [Triavil]                                                                                                                                                                                     | 40162726 | Antidepressant | Depression | Drugs |
| isocarboxazid 10 MG Oral Tablet                                                                                                                                                                                                                                 | 19004819 | Antidepressant | Depression | Drugs |
| trimipramine 50 MG Oral Capsule                                                                                                                                                                                                                                 | 705797   | Antidepressant | Depression | Drugs |
| protriptyline hydrochloride 10 MG Oral Tablet [Vivactil]                                                                                                                                                                                                        | 40175377 | Antidepressant | Depression | Drugs |
| imipramine pamoate 75 MG Oral Capsule [Tofranil-PM]                                                                                                                                                                                                             | 778323   | Antidepressant | Depression | Drugs |
| nefazodone hydrochloride 50 MG Oral Tablet [Serzone]                                                                                                                                                                                                            | 40238436 | Antidepressant | Depression | Drugs |
| alanine 5.4 MG/ML / arginine 12 MG/ML / aspartate 3.2 MG/ML / cysteine 0.24 MG/ML / glutamate 5 MG/ML / glycine 3.6 MG/ML / histidine 4.8 MG/ML / isoleucine 8.2 MG/ML / leucine 1.4 MG/ML / lysine 1.2 MG/ML / methionine 3.4 MG/ML / phenylalanine 4.8 MG/... | 40243299 | Antidepressant | Depression | Drugs |
| desipramine hydrochloride 75 MG Oral Tablet [Norpramin]                                                                                                                                                                                                         | 40237446 | Antidepressant | Depression | Drugs |
| imipramine pamoate 150 MG Oral Capsule [Tofranil-PM]                                                                                                                                                                                                            | 778326   | Antidepressant | Depression | Drugs |
| paroxetine hydrochloride 25 MG Extended Release Oral Tablet                                                                                                                                                                                                     | 722156   | Antidepressant | Depression | Drugs |
| alanine 11 MG/ML / arginine 8.5 MG/ML / glycine 11 MG/ML / histidine 2.6 MG/ML / isoleucine 6.2 MG/ML / leucine 8.1 MG/ML / lysine 6.24 MG/ML / magnesium chloride 0.00502 MEQ/ML / methionine 3.4 MG/ML / phenylalanine 3.8 MG/ML / potassium chloride 0.06... | 40243286 | Antidepressant | Depression | Drugs |
| 24 HR trazodone hydrochloride 150 MG Extended Release Oral Tablet [Olepro]                                                                                                                                                                                      | 40171494 | Antidepressant | Depression | Drugs |
| alanine 8.8 MG/ML / arginine 4.89 MG/ML / glucose 50 MG/ML / glycine 4.38 MG/ML / histidine 2.04 MG/ML / isoleucine 2.55 MG/ML / leucine 3.11 MG/ML / lysine 2.47 MG/ML / methionine 1.7 MG/ML / phenylalanine 2.38 MG/ML / proline 2.89 MG/ML / serine 2.13... | 19130795 | Antidepressant | Depression | Drugs |
| amitriptyline hydrochloride 25 MG / chlordiazepoxide 10 MG Oral Tablet                                                                                                                                                                                          | 40162701 | Antidepressant | Depression | Drugs |
| alanine 10.4 MG/ML / arginine 5.75 MG/ML / calcium chloride 0.004 MEQ/ML / dibasic potassium phosphate 2.61 MG/ML / glucose 200 MG/ML / glycine 5.15 MG/ML / histidine 2.4 MG/ML / isoleucine 3 MG/ML / leucine 3.65 MG/ML / lysine 2.9 MG/ML / magnesium ch... | 19131089 | Antidepressant | Depression | Drugs |
| 24 HR fluvoxamine maleate 150 MG Extended Release Oral Capsule [Luvox]                                                                                                                                                                                          | 40173467 | Antidepressant | Depression | Drugs |
| bupropion hydrobromide 348 MG Extended Release Oral Tablet                                                                                                                                                                                                      | 40222100 | Antidepressant | Depression | Drugs |
| milnacipran hydrochloride 12.5 MG Oral Tablet                                                                                                                                                                                                                   | 19080253 | Antidepressant | Depression | Drugs |
| Amitriptyline 20 MG/ML                                                                                                                                                                                                                                          | 589159   | Antidepressant | Depression | Drugs |
| amoxapine 25 MG Oral Tablet [Asendin]                                                                                                                                                                                                                           | 19029977 | Antidepressant | Depression | Drugs |
| {7 (vilazodone hydrochloride 10 MG Oral Tablet) / 23 (vilazodone hydrochloride 20 MG Oral Tablet) } Pack                                                                                                                                                        | 46234545 | Antidepressant | Depression | Drugs |
| maprotiline hydrochloride 50 MG Oral Tablet                                                                                                                                                                                                                     | 42800988 | Antidepressant | Depression | Drugs |
| 5-hydroxytryptophan 100 MG Oral Capsule                                                                                                                                                                                                                         | 19103431 | Antidepressant | Depression | Drugs |
| fluoxetine 25 MG / olanzapine 3 MG Oral Capsule                                                                                                                                                                                                                 | 755855   | Antidepressant | Depression | Drugs |
| alanine 27.6 MG/ML / arginine 19.6 MG/ML / aspartate 6 MG/ML / glutamate 10.2 MG/ML / glycine 20.6 MG/ML / histidine 11.8 MG/ML / isoleucine 10.8 MG/ML / leucine 10.8 MG/ML / lysine 13.5 MG/ML / methionine 7.6 MG/ML / phenylalanine 10 MG/ML / proline 1... | 19131138 | Antidepressant | Depression | Drugs |
| duloxetine 30 MG [Cymbalta]                                                                                                                                                                                                                                     | 19060283 | Antidepressant | Depression | Drugs |
| 5-hydroxytryptophan 200 MG Oral Capsule                                                                                                                                                                                                                         | 43531880 | Antidepressant | Depression | Drugs |
| 24 HR bupropion hydrobromide 174 MG Extended Release Oral Tablet [Aplenzin]                                                                                                                                                                                     | 40221878 | Antidepressant | Depression | Drugs |
| bupropion hydrochloride 100 MG Extended Release Oral Tablet [Wellbutrin]                                                                                                                                                                                        | 40222059 | Antidepressant | Depression | Drugs |
| amitriptyline hydrochloride 10 MG / perphenazine 4 MG Oral Tablet                                                                                                                                                                                               | 40162665 | Antidepressant | Depression | Drugs |
| 5-hydroxytryptophan 50 MG Oral Capsule                                                                                                                                                                                                                          | 1363520  | Antidepressant | Depression | Drugs |
| amitriptyline hydrochloride 25 MG / perphenazine 2 MG Oral Tablet [Triavil]                                                                                                                                                                                     | 40162707 | Antidepressant | Depression | Drugs |
| amitriptyline hydrochloride 10 MG / perphenazine 2 MG Oral Tablet [Triavil]                                                                                                                                                                                     | 40162661 | Antidepressant | Depression | Drugs |
| 24 HR bupropion hydrobromide 522 MG Extended Release Oral Tablet                                                                                                                                                                                                | 40221881 | Antidepressant | Depression | Drugs |
| bupropion hydrochloride 200 MG Extended Release Oral Tablet [Wellbutrin]                                                                                                                                                                                        | 40222076 | Antidepressant | Depression | Drugs |
| bupropion hydrochloride 300 MG Extended Release Oral Tablet [Wellbutrin]                                                                                                                                                                                        | 40222086 | Antidepressant | Depression | Drugs |

|                                                                                                                                                                                                                                                                 |          |                |            |       |  |
|-----------------------------------------------------------------------------------------------------------------------------------------------------------------------------------------------------------------------------------------------------------------|----------|----------------|------------|-------|--|
| bupropion hydrochloride 150 MG Extended Release Oral Tablet [Buproban]                                                                                                                                                                                          | 40222067 | Antidepressant | Depression | Drugs |  |
| maprotiline hydrochloride 75 MG Oral Tablet                                                                                                                                                                                                                     | 42800992 | Antidepressant | Depression | Drugs |  |
| PMDD fluoxetine 10 MG Oral Tablet                                                                                                                                                                                                                               | 740117   | Antidepressant | Depression | Drugs |  |
| trimipramine 100 MG Oral Capsule [Surmontil]                                                                                                                                                                                                                    | 19039154 | Antidepressant | Depression | Drugs |  |
| amitriptyline hydrochloride 75 MG Oral Tablet [Elavil]                                                                                                                                                                                                          | 40162738 | Antidepressant | Depression | Drugs |  |
| nefazodone hydrochloride 200 MG Oral Tablet [Serzone]                                                                                                                                                                                                           | 40238424 | Antidepressant | Depression | Drugs |  |
| isocarboxazid 10 MG Oral Tablet [Marplan]                                                                                                                                                                                                                       | 19025733 | Antidepressant | Depression | Drugs |  |
| 5-hydroxytryptophan 50 MG / magnesium oxide 50 MG / melatonin 2 MG / tryptophan 100 MG / vitamin B6 10 MG Oral Capsule [Somnicin]                                                                                                                               | 42799061 | Antidepressant | Depression | Drugs |  |
| maprotiline hydrochloride 25 MG Oral Tablet [Ludiomil]                                                                                                                                                                                                          | 42800985 | Antidepressant | Depression | Drugs |  |
| alanine 4.22 MG/ML / arginine 4.32 MG/ML / aspartate 2.98 MG/ML / glucose 200 MG/ML / glutamate 3.14 MG/ML / glycine 2.12 MG/ML / histidine 1.28 MG/ML / isoleucine 2.8 MG/ML / leucine 4.25 MG/ML / lysine 4.46 MG/ML / methionine 0.73 MG/ML / phenylalani... | 19130567 | Antidepressant | Depression | Drugs |  |
| alanine 8.8 MG/ML / arginine 4.89 MG/ML / glucose 100 MG/ML / glycine 4.38 MG/ML / histidine 2.04 MG/ML / isoleucine 2.55 MG/ML / leucine 3.11 MG/ML / lysine 2.47 MG/ML / methionine 1.7 MG/ML / phenylalanine 2.38 MG/ML / proline 2.89 MG/ML / serine 2.1... | 19130786 | Antidepressant | Depression | Drugs |  |
| fluoxetine 25 MG / olanzapine 6 MG Oral Capsule [Symbyax]                                                                                                                                                                                                       | 19127038 | Antidepressant | Depression | Drugs |  |
| duloxetine Oral Capsule                                                                                                                                                                                                                                         | 40058318 | Antidepressant | Depression | Drugs |  |
| trazodone Oral Tablet [Desyrel]                                                                                                                                                                                                                                 | 40090686 | Antidepressant | Depression | Drugs |  |
| bupropion Extended Release Oral Tablet [Wellbutrin]                                                                                                                                                                                                             | 40102862 | Antidepressant | Depression | Drugs |  |
| Sprinkle duloxetine 60 MG Delayed Release Oral Capsule [Drizalma]                                                                                                                                                                                               | 37496769 | Antidepressant | Depression | Drugs |  |
| tryptophan 500 MG Oral Tablet                                                                                                                                                                                                                                   | 19006223 | Antidepressant | Depression | Drugs |  |
| paroxetine mesylate 40 MG Oral Tablet                                                                                                                                                                                                                           | 35604708 | Antidepressant | Depression | Drugs |  |
| { 7 (vilazodone hydrochloride 10 MG Oral Tablet) / 7 (vilazodone hydrochloride 20 MG Oral Tablet) / 16 (vilazodone hydrochloride 40 MG Oral Tablet) } Pack                                                                                                      | 40235111 | Antidepressant | Depression | Drugs |  |
| paroxetine mesylate 30 MG Oral Tablet                                                                                                                                                                                                                           | 35604705 | Antidepressant | Depression | Drugs |  |
| 24 HR bupropion hydrobromide 174 MG Extended Release Oral Tablet                                                                                                                                                                                                | 40221877 | Antidepressant | Depression | Drugs |  |
| tryptophan                                                                                                                                                                                                                                                      | 19006186 | Antidepressant | Depression | Drugs |  |
| tryptophan 500 MG Oral Tablet [Pacitron]                                                                                                                                                                                                                        | 19024357 | Antidepressant | Depression | Drugs |  |
| amoxapine 100 MG Oral Tablet [Asendin]                                                                                                                                                                                                                          | 19029947 | Antidepressant | Depression | Drugs |  |
| amitriptyline hydrochloride 12.5 MG / chlordiazepoxide 5 MG Oral Tablet [Limbitor]                                                                                                                                                                              | 40162692 | Antidepressant | Depression | Drugs |  |
| amoxapine 50 MG Oral Tablet [Asendin]                                                                                                                                                                                                                           | 19029980 | Antidepressant | Depression | Drugs |  |
| fluoxetine 50 MG / olanzapine 6 MG Oral Capsule [Symbyax]                                                                                                                                                                                                       | 19127042 | Antidepressant | Depression | Drugs |  |
| Sprinkle duloxetine 20 MG Delayed Release Oral Capsule [Drizalma]                                                                                                                                                                                               | 37496760 | Antidepressant | Depression | Drugs |  |
| trimipramine 25 MG Oral Capsule                                                                                                                                                                                                                                 | 705796   | Antidepressant | Depression | Drugs |  |
| amoxapine 150 MG Oral Tablet [Asendin]                                                                                                                                                                                                                          | 19029974 | Antidepressant | Depression | Drugs |  |
| amitriptyline hydrochloride 25 MG / perphenazine 4 MG Oral Tablet                                                                                                                                                                                               | 40162711 | Antidepressant | Depression | Drugs |  |
| maprotiline hydrochloride 75 MG Oral Tablet [Ludiomil]                                                                                                                                                                                                          | 42800993 | Antidepressant | Depression | Drugs |  |
| alanine 10.4 MG/ML / arginine 5.75 MG/ML / calcium chloride 0.004 MEQ/ML / dibasic potassium phosphate 2.61 MG/ML / glucose 350 MG/ML / glycine 5.15 MG/ML / histidine 2.4 MG/ML / isoleucine 3 MG/ML / leucine 3.65 MG/ML / magnesium chloride 0.01 MEQ/ML...  | 19131095 | Antidepressant | Depression | Drugs |  |
| alanine 2.1 MG/ML / arginine 2.9 MG/ML / calcium acetate 0.003 MEQ/ML / cysteine 0.2 MG/ML / glycerin 30 MG/ML / glycine 4.2 MG/ML / histidine 0.85 MG/ML / isoleucine 2.1 MG/ML / leucine 2.7 MG/ML / lysine 3.1 MG/ML / magnesium acetate 0.008 MEQ/ML / m... | 19131215 | Antidepressant | Depression | Drugs |  |
| alanine 8.8 MG/ML / arginine 4.89 MG/ML / calcium chloride 0.004 MEQ/ML / dibasic potassium phosphate 2.61 MG/ML / glucose 50 MG/ML / glycine 4.38 MG/ML / histidine 2.04 MG/ML / isoleucine 2.55 MG/ML / leucine 3.11 MG/ML / lysine 2.47 MG/ML / magnesium... | 19131062 | Antidepressant | Depression | Drugs |  |
| alanine 8.8 MG/ML / arginine 4.89 MG/ML / glucose 50 MG/ML / glycine 4.38 MG/ML / histidine 2.04 MG/ML / isoleucine 2.55 MG/ML / leucine 3.11 MG/ML / lysine 2.47 MG/ML / methionine 1.7 MG/ML / phenylalanine 2.38 MG/ML / proline 2.89 MG/ML / serine 2.13... | 19130793 | Antidepressant | Depression | Drugs |  |
| imipramine hydrochloride 25 MG Oral Tablet [Pramimil]                                                                                                                                                                                                           | 19000966 | Antidepressant | Depression | Drugs |  |
| citalopram 10 MG Oral Tablet [Cipramil]                                                                                                                                                                                                                         | 19017328 | Antidepressant | Depression | Drugs |  |
| imipramine pamoate 125 MG Oral Capsule                                                                                                                                                                                                                          | 778353   | Antidepressant | Depression | Drugs |  |
| bupropion Extended Release Oral Tablet [Buproban]                                                                                                                                                                                                               | 40125347 | Antidepressant | Depression | Drugs |  |
| alanine 2.1 MG/ML / arginine 2.9 MG/ML / calcium acetate 0.003 MEQ/ML / cysteine 0.2 MG/ML / glycerin 30 MG/ML / glycine 4.2 MG/ML / histidine 0.85 MG/ML / isoleucine 2.1 MG/ML / leucine 2.7 MG/ML / lysine 3.1 MG/ML / magnesium acetate 0.008 MEQ/ML / m... | 19131217 | Antidepressant | Depression | Drugs |  |
| alanine 21.7 MG/ML / arginine 14.7 MG/ML / aspartate 4.34 MG/ML / glutamate 7.49 MG/ML / glycine 10.4 MG/ML / histidine 8.94 MG/ML / isoleucine 7.49 MG/ML / leucine 10.4 MG/ML / lysine 11.8 MG/ML / methionine 7.49 MG/ML / phenylalanine 10.4 MG/ML / pro... | 45892124 | Antidepressant | Depression | Drugs |  |
| citalopram 20 MG Oral Tablet [Cipramil]                                                                                                                                                                                                                         | 19010672 | Antidepressant | Depression | Drugs |  |
| alanine 10.4 MG/ML / arginine 5.75 MG/ML / calcium chloride 0.004 MEQ/ML / dibasic potassium phosphate 2.61 MG/ML / glucose 150 MG/ML / glycine 5.15 MG/ML / histidine 2.4 MG/ML / isoleucine 3 MG/ML / leucine 3.65 MG/ML / lysine 2.9 MG/ML / magnesium ch... | 19131080 | Antidepressant | Depression | Drugs |  |
| alanine 20.7 MG/ML / arginine 11.5 MG/ML / glycine 10.3 MG/ML / histidine 4.8 MG/ML / isoleucine 6 MG/ML / leucine 7.3 MG/ML / lysine 5.8 MG/ML / methionine 4 MG/ML / phenylalanine 5.6 MG/ML / proline 6.8 MG/ML / serine 5 MG/ML / threonine 4.2 MG/ML / ... | 19131341 | Antidepressant | Depression | Drugs |  |

|                                                                                                                                                                                                                                                                 |          |                |            |       |
|-----------------------------------------------------------------------------------------------------------------------------------------------------------------------------------------------------------------------------------------------------------------|----------|----------------|------------|-------|
| alanine 12.8 MG/ML / arginine 9.8 MG/ML / glycine 12.8 MG/ML / histidine 3 MG/ML / isoleucine 7.2 MG/ML / leucine 9.4 MG/ML / lysine 7.2 MG/ML / methionine 4 MG/ML / phenylalanine 4.4 MG/ML / proline 8.6 MG/ML / serine 4.2 MG/ML / threonine 5.2 MG/ML /... | 19133481 | Antidepressant | Depression | Drugs |
| imipramine hydrochloride 10 MG Oral Tablet [Pramimil]                                                                                                                                                                                                           | 19000965 | Antidepressant | Depression | Drugs |
| alanine 10.4 MG/ML / arginine 5.75 MG/ML / calcium chloride 0.004 MEQ/ML / dibasic potassium phosphate 2.61 MG/ML / glucose 200 MG/ML / glycine 5.15 MG/ML / histidine 2.4 MG/ML / isoleucine 3 MG/ML / leucine 3.65 MG/ML / lysine 2.9 MG/ML / magnesium ch... | 19131087 | Antidepressant | Depression | Drugs |
| alanine 5.7 MG/ML / arginine 3.16 MG/ML / calcium chloride 0.004 MEQ/ML / dibasic potassium phosphate 2.61 MG/ML / glucose 50 MG/ML / glycine 2.83 MG/ML / histidine 1.32 MG/ML / isoleucine 1.65 MG/ML / leucine 2.01 MG/ML / lysine 1.59 MG/ML / magnesium... | 19131071 | Antidepressant | Depression | Drugs |
| duloxetine 20 MG Oral Capsule                                                                                                                                                                                                                                   | 19112657 | Antidepressant | Depression | Drugs |
| vortioxetine Oral Tablet [Trintellix]                                                                                                                                                                                                                           | 42629568 | Antidepressant | Depression | Drugs |
| alanine 8.44 MG/ML / arginine 8.65 MG/ML / aspartate 5.95 MG/ML / glutamate 6.27 MG/ML / glycine 4.25 MG/ML / histidine 2.55 MG/ML / isoleucine 5.61 MG/ML / leucine 8.5 MG/ML / lysine 8.93 MG/ML / methionine 1.46 MG/ML / phenylalanine 2.53 MG/ML / prol... | 19130651 | Antidepressant | Depression | Drugs |
| venlafaxine 75 MG [Effexor]                                                                                                                                                                                                                                     | 19118743 | Antidepressant | Depression | Drugs |
| amitriptyline 30 MG                                                                                                                                                                                                                                             | 19109687 | Antidepressant | Depression | Drugs |
| clomipramine hydrochloride 50 MG                                                                                                                                                                                                                                | 40163069 | Antidepressant | Depression | Drugs |
| doxepin 100 MG                                                                                                                                                                                                                                                  | 19085200 | Antidepressant | Depression | Drugs |
| nortriptyline 50 MG [Pamelor]                                                                                                                                                                                                                                   | 19026384 | Antidepressant | Depression | Drugs |
| mirtazapine 45 MG [Remeron]                                                                                                                                                                                                                                     | 19015749 | Antidepressant | Depression | Drugs |
| trazodone hydrochloride 50 MG                                                                                                                                                                                                                                   | 40163471 | Antidepressant | Depression | Drugs |
| trazodone hydrochloride 100 MG                                                                                                                                                                                                                                  | 40163458 | Antidepressant | Depression | Drugs |
| fluoxetine 40 MG [Prozac]                                                                                                                                                                                                                                       | 19080284 | Antidepressant | Depression | Drugs |
| fluoxetine 20 MG [Prozac]                                                                                                                                                                                                                                       | 19080281 | Antidepressant | Depression | Drugs |
| doxepin 10 MG                                                                                                                                                                                                                                                   | 738240   | Antidepressant | Depression | Drugs |
| fluoxetine 60 MG                                                                                                                                                                                                                                                | 19091121 | Antidepressant | Depression | Drugs |
| amitriptyline hydrochloride 50 MG                                                                                                                                                                                                                               | 40162724 | Antidepressant | Depression | Drugs |
| escitalopram 20 MG [Lexapro]                                                                                                                                                                                                                                    | 19033450 | Antidepressant | Depression | Drugs |
| sertraline 50 MG [Zoloft]                                                                                                                                                                                                                                       | 19043842 | Antidepressant | Depression | Drugs |
| bupropion hydrochloride 100 MG [Wellbutrin]                                                                                                                                                                                                                     | 40222063 | Antidepressant | Depression | Drugs |
| sertraline 100 MG                                                                                                                                                                                                                                               | 19083100 | Antidepressant | Depression | Drugs |
| bupropion hydrochloride 200 MG [Wellbutrin]                                                                                                                                                                                                                     | 40222077 | Antidepressant | Depression | Drugs |
| nefazodone hydrochloride 150 MG                                                                                                                                                                                                                                 | 40238418 | Antidepressant | Depression | Drugs |
| clomipramine hydrochloride 25 MG [Anafranil]                                                                                                                                                                                                                    | 40163066 | Antidepressant | Depression | Drugs |
| nortriptyline 25 MG                                                                                                                                                                                                                                             | 19083195 | Antidepressant | Depression | Drugs |
| imipramine hydrochloride 25 MG                                                                                                                                                                                                                                  | 778295   | Antidepressant | Depression | Drugs |
| nortriptyline 10 MG                                                                                                                                                                                                                                             | 721761   | Antidepressant | Depression | Drugs |
| clomipramine hydrochloride 50 MG [Anafranil]                                                                                                                                                                                                                    | 40163073 | Antidepressant | Depression | Drugs |
| bupropion hydrochloride 150 MG                                                                                                                                                                                                                                  | 40222064 | Antidepressant | Depression | Drugs |
| doxepin 50 MG                                                                                                                                                                                                                                                   | 738262   | Antidepressant | Depression | Drugs |
| fluvoxamine maleate 100 MG [Luvox]                                                                                                                                                                                                                              | 40174727 | Antidepressant | Depression | Drugs |
| mirtazapine 30 MG [Remeron]                                                                                                                                                                                                                                     | 19015748 | Antidepressant | Depression | Drugs |
| venlafaxine 37.5 MG [Effexor]                                                                                                                                                                                                                                   | 19021629 | Antidepressant | Depression | Drugs |
| escitalopram 10 MG [Lexapro]                                                                                                                                                                                                                                    | 19033449 | Antidepressant | Depression | Drugs |
| bupropion hydrochloride 300 MG                                                                                                                                                                                                                                  | 40222083 | Antidepressant | Depression | Drugs |
| bupropion hydrochloride 150 MG [Wellbutrin]                                                                                                                                                                                                                     | 40222072 | Antidepressant | Depression | Drugs |
| citalopram 20 MG [Celexa]                                                                                                                                                                                                                                       | 19120296 | Antidepressant | Depression | Drugs |
| nortriptyline 30 MG                                                                                                                                                                                                                                             | 721796   | Antidepressant | Depression | Drugs |
| sertraline 25 MG                                                                                                                                                                                                                                                | 739282   | Antidepressant | Depression | Drugs |
| bupropion hydrochloride 75 MG [Wellbutrin]                                                                                                                                                                                                                      | 40222094 | Antidepressant | Depression | Drugs |
| doxepin 25 MG                                                                                                                                                                                                                                                   | 738241   | Antidepressant | Depression | Drugs |
| duloxetine 20 MG [Cymbalta]                                                                                                                                                                                                                                     | 19060282 | Antidepressant | Depression | Drugs |
| venlafaxine 150 MG [Effexor]                                                                                                                                                                                                                                    | 19127359 | Antidepressant | Depression | Drugs |
| amitriptyline 25 MG                                                                                                                                                                                                                                             | 19085723 | Antidepressant | Depression | Drugs |
| citalopram 10 MG [Celexa]                                                                                                                                                                                                                                       | 19120749 | Antidepressant | Depression | Drugs |
| sertraline 100 MG [Zoloft]                                                                                                                                                                                                                                      | 19043841 | Antidepressant | Depression | Drugs |
| sertraline 25 MG [Zoloft]                                                                                                                                                                                                                                       | 19043843 | Antidepressant | Depression | Drugs |
| imipramine hydrochloride 50 MG                                                                                                                                                                                                                                  | 778298   | Antidepressant | Depression | Drugs |
| nortriptyline 75 MG                                                                                                                                                                                                                                             | 721794   | Antidepressant | Depression | Drugs |
| imipramine hydrochloride 10 MG                                                                                                                                                                                                                                  | 778356   | Antidepressant | Depression | Drugs |
| mirtazapine 45 MG                                                                                                                                                                                                                                               | 725203   | Antidepressant | Depression | Drugs |
| fluoxetine 10 MG                                                                                                                                                                                                                                                | 755762   | Antidepressant | Depression | Drugs |
| amitriptyline 75 MG                                                                                                                                                                                                                                             | 710183   | Antidepressant | Depression | Drugs |
| amitriptyline 10 MG                                                                                                                                                                                                                                             | 710185   | Antidepressant | Depression | Drugs |
| amitriptyline hydrochloride 25 MG [Elavil]                                                                                                                                                                                                                      | 40162720 | Antidepressant | Depression | Drugs |
| nefazodone hydrochloride 200 MG [Serzone]                                                                                                                                                                                                                       | 40238425 | Antidepressant | Depression | Drugs |
| duloxetine 60 MG [Cymbalta]                                                                                                                                                                                                                                     | 19060284 | Antidepressant | Depression | Drugs |
| citalopram 40 MG                                                                                                                                                                                                                                                | 797637   | Antidepressant | Depression | Drugs |
| bupropion hydrochloride 150 MG [Zyban]                                                                                                                                                                                                                          | 40222073 | Antidepressant | Depression | Drugs |

|                                              |          |                |            |       |  |
|----------------------------------------------|----------|----------------|------------|-------|--|
| fluoxetine 40 MG                             | 19084977 | Antidepressant | Depression | Drugs |  |
| bupropion hydrochloride 300 MG [Wellbutrin]  | 40222088 | Antidepressant | Depression | Drugs |  |
| citalopram 40 MG [Celexa]                    | 19058160 | Antidepressant | Depression | Drugs |  |
| trazodone hydrochloride 150 MG [Desyre]      | 40163466 | Antidepressant | Depression | Drugs |  |
| bupropion hydrochloride 100 MG               | 40222056 | Antidepressant | Depression | Drugs |  |
| amitriptyline hydrochloride 100 MG           | 40162682 | Antidepressant | Depression | Drugs |  |
| bupropion hydrochloride 200 MG               | 40222074 | Antidepressant | Depression | Drugs |  |
| fluoxetine 20 MG                             | 755763   | Antidepressant | Depression | Drugs |  |
| mirtazapine 15 MG [Remeron]                  | 19015747 | Antidepressant | Depression | Drugs |  |
| mirtazapine 15 MG                            | 19095236 | Antidepressant | Depression | Drugs |  |
| clomipramine hydrochloride 25 MG             | 40163062 | Antidepressant | Depression | Drugs |  |
| nefazodone hydrochloride 150 MG [Serzone]    | 40238421 | Antidepressant | Depression | Drugs |  |
| trimipramine                                 | 705755   | Antidepressant | Depression | Drugs |  |
| fluoxetine 15 MG                             | 19131596 | Antidepressant | Depression | Drugs |  |
| imipramine hydrochloride 150 MG              | 19135757 | Antidepressant | Depression | Drugs |  |
| sertraline 200 MG                            | 739283   | Antidepressant | Depression | Drugs |  |
| nortriptyline 25 MG [Pamelor]                | 19118843 | Antidepressant | Depression | Drugs |  |
| nortriptyline 75 MG [Pamelor]                | 19118855 | Antidepressant | Depression | Drugs |  |
| protriptyline hydrochloride 10 MG [Vivactil] | 40175378 | Antidepressant | Depression | Drugs |  |
| desipramine 50 MG                            | 19082930 | Antidepressant | Depression | Drugs |  |
| bupropion hydrochloride 50 MG                | 40222089 | Antidepressant | Depression | Drugs |  |
| fluvoxamine maleate 50 MG [Luvox]            | 40174741 | Antidepressant | Depression | Drugs |  |
| protriptyline hydrochloride 10 MG            | 40175375 | Antidepressant | Depression | Drugs |  |
| fluoxetine 20 MG [Sarafem]                   | 19090639 | Antidepressant | Depression | Drugs |  |
| imipramine hydrochloride 10 MG [Tofranil]    | 19001275 | Antidepressant | Depression | Drugs |  |
| nortriptyline 50 MG                          | 721793   | Antidepressant | Depression | Drugs |  |
| bupropion hydrochloride 100 MG [Budeprion]   | 40222062 | Antidepressant | Depression | Drugs |  |
| amitriptyline hydrochloride 10 MG [Elavil]   | 40162675 | Antidepressant | Depression | Drugs |  |
| nefazodone hydrochloride 100 MG [Serzone]    | 40238417 | Antidepressant | Depression | Drugs |  |
| imipramine hydrochloride 75 MG               | 19135759 | Antidepressant | Depression | Drugs |  |
| duloxetine 30 MG                             | 715296   | Antidepressant | Depression | Drugs |  |
| amitriptyline hydrochloride 150 MG           | 40162694 | Antidepressant | Depression | Drugs |  |
| fluvoxamine maleate 150 MG                   | 40174728 | Antidepressant | Depression | Drugs |  |
| clomipramine hydrochloride 20 MG             | 40169581 | Antidepressant | Depression | Drugs |  |
| fluoxetine 50 MG                             | 19103071 | Antidepressant | Depression | Drugs |  |
| desipramine 25 MG                            | 19082929 | Antidepressant | Depression | Drugs |  |
| trazodone hydrochloride 50 MG [Desyre]       | 40163475 | Antidepressant | Depression | Drugs |  |
| trazodone 75 MG                              | 703615   | Antidepressant | Depression | Drugs |  |
| trazodone hydrochloride 150 MG               | 40163463 | Antidepressant | Depression | Drugs |  |
| fluvoxamine 50 MG                            | 751419   | Antidepressant | Depression | Drugs |  |
| trazodone 25 MG                              | 19109758 | Antidepressant | Depression | Drugs |  |
| fluoxetine 10 MG [Prozac]                    | 19080283 | Antidepressant | Depression | Drugs |  |
| fluoxetine 60 MG [Prozac]                    | 19116858 | Antidepressant | Depression | Drugs |  |
| bupropion hydrochloride 150 MG [Budeprion]   | 40222070 | Antidepressant | Depression | Drugs |  |
| escitalopram 5 MG [Lexapro]                  | 19121118 | Antidepressant | Depression | Drugs |  |
| mirtazapine 30 MG                            | 19095237 | Antidepressant | Depression | Drugs |  |
| nortriptyline 20 MG                          | 721797   | Antidepressant | Depression | Drugs |  |
| citalopram 20 MG                             | 797636   | Antidepressant | Depression | Drugs |  |
| doxepin 75 MG                                | 738263   | Antidepressant | Depression | Drugs |  |
| citalopram 10 MG                             | 797639   | Antidepressant | Depression | Drugs |  |
| fluvoxamine maleate 150 MG [Luvox]           | 40174733 | Antidepressant | Depression | Drugs |  |
| sertraline 50 MG                             | 739211   | Antidepressant | Depression | Drugs |  |
| venlafaxine 150 MG                           | 743759   | Antidepressant | Depression | Drugs |  |
| fluvoxamine maleate 25 MG                    | 40174734 | Antidepressant | Depression | Drugs |  |
| sertraline 150 MG                            | 739284   | Antidepressant | Depression | Drugs |  |
| fluoxetine 4 MG/ML [Prozac]                  | 19080282 | Antidepressant | Depression | Drugs |  |
| nefazodone hydrochloride 250 MG [Serzone]    | 40238431 | Antidepressant | Depression | Drugs |  |
| venlafaxine 225 MG                           | 19131402 | Antidepressant | Depression | Drugs |  |
| clomipramine hydrochloride 75 MG [Anafranil] | 40163078 | Antidepressant | Depression | Drugs |  |
| amitriptyline hydrochloride 50 MG [Elavil]   | 40162733 | Antidepressant | Depression | Drugs |  |
| sertraline 20 MG/ML [Zoloft]                 | 40165284 | Antidepressant | Depression | Drugs |  |
| venlafaxine 37.5 MG                          | 743755   | Antidepressant | Depression | Drugs |  |
| tranylcypromine 10 MG [Pamate]               | 19115965 | Antidepressant | Depression | Drugs |  |
| fluvoxamine 100 MG                           | 751420   | Antidepressant | Depression | Drugs |  |
| imipramine hydrochloride 25 MG [Tofranil]    | 19001272 | Antidepressant | Depression | Drugs |  |
| venlafaxine 75 MG                            | 19083160 | Antidepressant | Depression | Drugs |  |
| nefazodone hydrochloride 300 MG              | 40238432 | Antidepressant | Depression | Drugs |  |
| protriptyline hydrochloride 5 MG             | 40175379 | Antidepressant | Depression | Drugs |  |
| desipramine hydrochloride 100 MG             | 40237421 | Antidepressant | Depression | Drugs |  |
| nortriptyline 10 MG [Pamelor]                | 19026382 | Antidepressant | Depression | Drugs |  |
| desipramine 40 MG                            | 717063   | Antidepressant | Depression | Drugs |  |
| trazodone hydrochloride 300 MG [Desyre]      | 40163470 | Antidepressant | Depression | Drugs |  |



|                                                                                                                                                                                                                                                                 |          |                |            |       |  |
|-----------------------------------------------------------------------------------------------------------------------------------------------------------------------------------------------------------------------------------------------------------------|----------|----------------|------------|-------|--|
| desipramine dibudinate 30 MG                                                                                                                                                                                                                                    | 40237415 | Antidepressant | Depression | Drugs |  |
| desipramine hydrochloride 10 MG                                                                                                                                                                                                                                 | 40237417 | Antidepressant | Depression | Drugs |  |
| fluoxetine 90 MG                                                                                                                                                                                                                                                | 755766   | Antidepressant | Depression | Drugs |  |
| bupropion hydrochloride 450 MG                                                                                                                                                                                                                                  | 42705084 | Antidepressant | Depression | Drugs |  |
| sertraline Oral Tablet                                                                                                                                                                                                                                          | 40081943 | Antidepressant | Depression | Drugs |  |
| duloxetine 20 MG                                                                                                                                                                                                                                                | 715293   | Antidepressant | Depression | Drugs |  |
| nefazodone hydrochloride 50 MG [Serzone]                                                                                                                                                                                                                        | 40238437 | Antidepressant | Depression | Drugs |  |
| trazodone hydrochloride 300 MG                                                                                                                                                                                                                                  | 40163467 | Antidepressant | Depression | Drugs |  |
| fluoxetine 10 MG [Sarafem]                                                                                                                                                                                                                                      | 19090638 | Antidepressant | Depression | Drugs |  |
| trazodone 10 MG/ML                                                                                                                                                                                                                                              | 703614   | Antidepressant | Depression | Drugs |  |
| nortriptyline 40 MG                                                                                                                                                                                                                                             | 721798   | Antidepressant | Depression | Drugs |  |
| isocarboxazid                                                                                                                                                                                                                                                   | 781705   | Antidepressant | Depression | Drugs |  |
| doxepin 40 MG/ML                                                                                                                                                                                                                                                | 19109670 | Antidepressant | Depression | Drugs |  |
| venlafaxine 25 MG [Effexor]                                                                                                                                                                                                                                     | 19021628 | Antidepressant | Depression | Drugs |  |
| venlafaxine 50 MG [Effexor]                                                                                                                                                                                                                                     | 19118741 | Antidepressant | Depression | Drugs |  |
| fluoxetine 90 MG [Prozac]                                                                                                                                                                                                                                       | 19113117 | Antidepressant | Depression | Drugs |  |
| amitriptyline hydrochloride 5 MG/ML                                                                                                                                                                                                                             | 40162722 | Antidepressant | Depression | Drugs |  |
| fluvoxamine maleate 100 MG                                                                                                                                                                                                                                      | 40174722 | Antidepressant | Depression | Drugs |  |
| imipramine pamoate 100 MG                                                                                                                                                                                                                                       | 19134044 | Antidepressant | Depression | Drugs |  |
| venlafaxine 100 MG [Effexor]                                                                                                                                                                                                                                    | 19021627 | Antidepressant | Depression | Drugs |  |
| amitriptyline hydrochloride 12.5 MG                                                                                                                                                                                                                             | 40162688 | Antidepressant | Depression | Drugs |  |
| protriptyline hydrochloride 5 MG [Vivactil]                                                                                                                                                                                                                     | 40175382 | Antidepressant | Depression | Drugs |  |
| fluoxetine 25 MG / olanzapine 12 MG Oral Capsule                                                                                                                                                                                                                | 19102553 | Antidepressant | Depression | Drugs |  |
| nefazodone hydrochloride 200 MG                                                                                                                                                                                                                                 | 40238422 | Antidepressant | Depression | Drugs |  |
| citalopram 2 MG/ML [Celexa]                                                                                                                                                                                                                                     | 19058161 | Antidepressant | Depression | Drugs |  |
| imipramine pamoate 125 MG                                                                                                                                                                                                                                       | 778352   | Antidepressant | Depression | Drugs |  |
| phenelzine 15 MG [Nardil]                                                                                                                                                                                                                                       | 19048255 | Antidepressant | Depression | Drugs |  |
| clomipramine 75 MG                                                                                                                                                                                                                                              | 19085292 | Antidepressant | Depression | Drugs |  |
| doxepin hydrochloride 150 MG                                                                                                                                                                                                                                    | 40224890 | Antidepressant | Depression | Drugs |  |
| desipramine hydrochloride 150 MG                                                                                                                                                                                                                                | 40237427 | Antidepressant | Depression | Drugs |  |
| amitriptyline 15 MG                                                                                                                                                                                                                                             | 710263   | Antidepressant | Depression | Drugs |  |
| fluvoxamine maleate 150 MG Extended Release Oral Capsule                                                                                                                                                                                                        | 40174729 | Antidepressant | Depression | Drugs |  |
| trazodone hydrochloride 100 MG [Desyre]                                                                                                                                                                                                                         | 40163462 | Antidepressant | Depression | Drugs |  |
| fluoxetine 50 MG / olanzapine 12 MG Oral Capsule [Symbyax]                                                                                                                                                                                                      | 19127040 | Antidepressant | Depression | Drugs |  |
| trazodone Oral Solution                                                                                                                                                                                                                                         | 40090682 | Antidepressant | Depression | Drugs |  |
| Sprinkle duloxetine 30 MG Delayed Release Oral Capsule [Drizalma]                                                                                                                                                                                               | 37496763 | Antidepressant | Depression | Drugs |  |
| alanine 9.93 MG/ML / arginine 10.2 MG/ML / aspartate 7 MG/ML / glutamate 7.38 MG/ML / glycine 5 MG/ML / histidine 3 MG/ML / isoleucine 6.6 MG/ML / leucine 10 MG/ML / lysine 10.5 MG/ML / methionine 1.72 MG/ML / phenylalanine 2.98 MG/ML / proline 7.22 MG... | 19130670 | Antidepressant | Depression | Drugs |  |
| maprotiline hydrochloride 25 MG                                                                                                                                                                                                                                 | 42800983 | Antidepressant | Depression | Drugs |  |
| bupropion hydrochloride 75 MG                                                                                                                                                                                                                                   | 40222091 | Antidepressant | Depression | Drugs |  |
| escitalopram 10 MG                                                                                                                                                                                                                                              | 19098080 | Antidepressant | Depression | Drugs |  |
| esketamine 140 MG/ML Nasal Spray                                                                                                                                                                                                                                | 1366618  | Antidepressant | Depression | Drugs |  |
| escitalopram 20 MG                                                                                                                                                                                                                                              | 715968   | Antidepressant | Depression | Drugs |  |
| mirtazapine 7.5 MG                                                                                                                                                                                                                                              | 19112587 | Antidepressant | Depression | Drugs |  |
| duloxetine 60 MG                                                                                                                                                                                                                                                | 715299   | Antidepressant | Depression | Drugs |  |
| desipramine hydrochloride 75 MG                                                                                                                                                                                                                                 | 40237444 | Antidepressant | Depression | Drugs |  |
| amitriptyline 75 MG [Elavil]                                                                                                                                                                                                                                    | 19117641 | Antidepressant | Depression | Drugs |  |
| paroxetine Oral Tablet                                                                                                                                                                                                                                          | 40071301 | Antidepressant | Depression | Drugs |  |
| doxepin hydrochloride 25 MG [Sinequan]                                                                                                                                                                                                                          | 40224901 | Antidepressant | Depression | Drugs |  |
| amitriptyline hydrochloride 10 MG Oral Tablet [Endep]                                                                                                                                                                                                           | 40162674 | Antidepressant | Depression | Drugs |  |
| Sprinkle duloxetine 40 MG Delayed Release Oral Capsule [Drizalma]                                                                                                                                                                                               | 37496766 | Antidepressant | Depression | Drugs |  |
| bupropion hydrochloride 300 MG [Budeprion]                                                                                                                                                                                                                      | 40222087 | Antidepressant | Depression | Drugs |  |
| amitriptyline 60 MG                                                                                                                                                                                                                                             | 19110100 | Antidepressant | Depression | Drugs |  |
| fluvoxamine maleate 25 MG [Luvox]                                                                                                                                                                                                                               | 40174737 | Antidepressant | Depression | Drugs |  |
| venlafaxine 100 MG                                                                                                                                                                                                                                              | 743754   | Antidepressant | Depression | Drugs |  |
| citalopram 2 MG/ML                                                                                                                                                                                                                                              | 19084879 | Antidepressant | Depression | Drugs |  |
| venlafaxine 25 MG                                                                                                                                                                                                                                               | 19086246 | Antidepressant | Depression | Drugs |  |
| maprotiline hydrochloride 50 MG [Ludiomil]                                                                                                                                                                                                                      | 42800990 | Antidepressant | Depression | Drugs |  |
| amitriptyline 90 MG                                                                                                                                                                                                                                             | 19109688 | Antidepressant | Depression | Drugs |  |
| maprotiline hydrochloride 75 MG                                                                                                                                                                                                                                 | 42800991 | Antidepressant | Depression | Drugs |  |
| nortriptyline 10 MG Oral Tablet                                                                                                                                                                                                                                 | 721728   | Antidepressant | Depression | Drugs |  |
| alanine 9.93 MG/ML / arginine 10.2 MG/ML / aspartate 7 MG/ML / glutamate 7.38 MG/ML / glycine 5 MG/ML / histidine 3 MG/ML / isoleucine 6.6 MG/ML / leucine 10 MG/ML / lysine 10.5 MG/ML / methionine 1.72 MG/ML / phenylalanine 2.98 MG/ML / proline 7.22 MG... | 19130668 | Antidepressant | Depression | Drugs |  |
| tryptophan Oral Tablet                                                                                                                                                                                                                                          | 40088846 | Antidepressant | Depression | Drugs |  |
| nefazodone hydrochloride 100 MG                                                                                                                                                                                                                                 | 40238414 | Antidepressant | Depression | Drugs |  |
| amitriptyline 2 MG/ML                                                                                                                                                                                                                                           | 19087006 | Antidepressant | Depression | Drugs |  |
| alanine 21.7 MG/ML / arginine 14.7 MG/ML / aspartate 4.34 MG/ML / glutamate 7.49 MG/ML / glycine 10.4 MG/ML / histidine 8.94 MG/ML / isoleucine 7.49 MG/ML / leucine 10.4 MG/ML / lysine 11.8 MG/ML / methionine 7.49 MG/ML / phenylalanine 10.4 MG/ML / pro... | 19130881 | Antidepressant | Depression | Drugs |  |

|                                                                                                                                                                                                                                                                 |          |                |            |            |          |
|-----------------------------------------------------------------------------------------------------------------------------------------------------------------------------------------------------------------------------------------------------------------|----------|----------------|------------|------------|----------|
| nortriptyline 25 MG [Aventyl]                                                                                                                                                                                                                                   | 19115958 | Antidepressant | Depression | Drugs      |          |
| fluoxetine 6 MG                                                                                                                                                                                                                                                 | 755770   | Antidepressant | Depression | Drugs      |          |
| nefazodone hydrochloride 25 MG                                                                                                                                                                                                                                  | 40238426 | Antidepressant | Depression | Drugs      |          |
| fluoxetine 25 MG                                                                                                                                                                                                                                                | 19103068 | Antidepressant | Depression | Drugs      |          |
| fluoxetine hydrochloride 16 MG                                                                                                                                                                                                                                  | 40174701 | Antidepressant | Depression | Drugs      |          |
| fluoxetine 25 MG / olanzapine 3 MG Oral Capsule [Symbyax]                                                                                                                                                                                                       | 19127046 | Antidepressant | Depression | Drugs      |          |
| desvenlafaxine 100 MG Extended Release Oral Tablet [Pristiq]                                                                                                                                                                                                    | 19134912 | Antidepressant | Depression | Drugs      |          |
| alanine 5.4 MG/ML / arginine 12 MG/ML / aspartate 3.2 MG/ML / cysteine 0.24 MG/ML / glutamate 5 MG/ML / glycine 3.6 MG/ML / histidine 4.8 MG/ML / isoleucine 8.2 MG/ML / leucine 1.4 MG/ML / lysine 1.2 MG/ML / methionine 3.4 MG/ML / phenylalanine 4.8 MG/... | 19130902 | Antidepressant | Depression | Drugs      |          |
| doxepin 5 MG                                                                                                                                                                                                                                                    | 19109695 | Antidepressant | Depression | Drugs      |          |
| clomipramine hydrochloride 10 MG                                                                                                                                                                                                                                | 40163057 | Antidepressant | Depression | Drugs      |          |
| nefazodone hydrochloride 50 MG                                                                                                                                                                                                                                  | 40238434 | Antidepressant | Depression | Drugs      |          |
| venlafaxine 50 MG                                                                                                                                                                                                                                               | 19083159 | Antidepressant | Depression | Drugs      |          |
| amitriptyline 120 MG                                                                                                                                                                                                                                            | 19109686 | Antidepressant | Depression | Drugs      |          |
| bupropion                                                                                                                                                                                                                                                       | 750982   | Antidepressant | Depression | Drugs      |          |
| trazodone                                                                                                                                                                                                                                                       | 703547   | Antidepressant | Depression | Drugs      |          |
| citalopram                                                                                                                                                                                                                                                      | 797617   | Antidepressant | Depression | Drugs      |          |
| duloxetine                                                                                                                                                                                                                                                      | 715259   | Antidepressant | Depression | Drugs      |          |
| fluoxetine                                                                                                                                                                                                                                                      | 755695   | Antidepressant | Depression | Drugs      |          |
| paroxetine                                                                                                                                                                                                                                                      | 722031   | Antidepressant | Depression | Drugs      |          |
| sertraline                                                                                                                                                                                                                                                      | 739138   | Antidepressant | Depression | Drugs      |          |
| mirtazapine                                                                                                                                                                                                                                                     | 725131   | Antidepressant | Depression | Drugs      |          |
| venlafaxine                                                                                                                                                                                                                                                     | 743670   | Antidepressant | Depression | Drugs      |          |
| escitalopram                                                                                                                                                                                                                                                    | 715939   | Antidepressant | Depression | Drugs      |          |
| amitriptyline                                                                                                                                                                                                                                                   | 710062   | Antidepressant | Depression | Drugs      |          |
| nortriptyline                                                                                                                                                                                                                                                   | 721724   | Antidepressant | Depression | Drugs      |          |
| citalopram 10 MG Oral Tablet                                                                                                                                                                                                                                    | 797632   | Antidepressant | Depression | Drugs      |          |
| citalopram 20 MG Oral Tablet                                                                                                                                                                                                                                    | 19023636 | Antidepressant | Depression | Drugs      |          |
| citalopram 40 MG Oral Tablet                                                                                                                                                                                                                                    | 19075394 | Antidepressant | Depression | Drugs      |          |
| sertraline 25 MG Oral Tablet                                                                                                                                                                                                                                    | 19079497 | Antidepressant | Depression | Drugs      |          |
| sertraline 50 MG Oral Tablet                                                                                                                                                                                                                                    | 739209   | Antidepressant | Depression | Drugs      |          |
| fluoxetine 10 MG Oral Capsule                                                                                                                                                                                                                                   | 19077462 | Antidepressant | Depression | Drugs      |          |
| fluoxetine 20 MG Oral Capsule                                                                                                                                                                                                                                   | 19077463 | Antidepressant | Depression | Drugs      |          |
| fluoxetine 40 MG Oral Capsule                                                                                                                                                                                                                                   | 755739   | Antidepressant | Depression | Drugs      |          |
| mirtazapine 15 MG Oral Tablet                                                                                                                                                                                                                                   | 725178   | Antidepressant | Depression | Drugs      |          |
| mirtazapine 30 MG Oral Tablet                                                                                                                                                                                                                                   | 725180   | Antidepressant | Depression | Drugs      |          |
| sertraline 100 MG Oral Tablet                                                                                                                                                                                                                                   | 739207   | Antidepressant | Depression | Drugs      |          |
| escitalopram 10 MG Oral Tablet                                                                                                                                                                                                                                  | 715940   | Antidepressant | Depression | Drugs      |          |
| escitalopram 20 MG Oral Tablet                                                                                                                                                                                                                                  | 19098166 | Antidepressant | Depression | Drugs      |          |
| nortriptyline 10 MG Oral Capsule                                                                                                                                                                                                                                | 19019412 | Antidepressant | Depression | Drugs      |          |
| nortriptyline 25 MG Oral Capsule                                                                                                                                                                                                                                | 721760   | Antidepressant | Depression | Drugs      |          |
| sertraline 50 MG Oral Tablet [Zoloft]                                                                                                                                                                                                                           | 19037684 | Antidepressant | Depression | Drugs      |          |
| sertraline 100 MG Oral Tablet [Zoloft]                                                                                                                                                                                                                          | 19037642 | Antidepressant | Depression | Drugs      |          |
| trazodone hydrochloride 50 MG Oral Tablet                                                                                                                                                                                                                       | 40163473 | Antidepressant | Depression | Drugs      |          |
| paroxetine hydrochloride 20 MG Oral Tablet                                                                                                                                                                                                                      | 35604576 | Antidepressant | Depression | Drugs      |          |
| paroxetine hydrochloride 40 MG Oral Tablet                                                                                                                                                                                                                      | 35604586 | Antidepressant | Depression | Drugs      |          |
| trazodone hydrochloride 100 MG Oral Tablet                                                                                                                                                                                                                      | 40163460 | Antidepressant | Depression | Drugs      |          |
| trazodone hydrochloride 150 MG Oral Tablet                                                                                                                                                                                                                      | 40163464 | Antidepressant | Depression | Drugs      |          |
| amitriptyline hydrochloride 10 MG Oral Tablet                                                                                                                                                                                                                   | 40162672 | Antidepressant | Depression | Drugs      |          |
| amitriptyline hydrochloride 25 MG Oral Tablet                                                                                                                                                                                                                   | 40162717 | Antidepressant | Depression | Drugs      |          |
| amitriptyline hydrochloride 50 MG Oral Tablet                                                                                                                                                                                                                   | 40162729 | Antidepressant | Depression | Drugs      |          |
| duloxetine 20 MG Delayed Release Oral Capsule                                                                                                                                                                                                                   | 715294   | Antidepressant | Depression | Drugs      |          |
| duloxetine 30 MG Delayed Release Oral Capsule                                                                                                                                                                                                                   | 19122148 | Antidepressant | Depression | Drugs      |          |
| duloxetine 60 MG Delayed Release Oral Capsule                                                                                                                                                                                                                   | 715300   | Antidepressant | Depression | Drugs      |          |
| 24 HR venlafaxine 75 MG Extended Release Oral Capsule                                                                                                                                                                                                           | 743721   | Antidepressant | Depression | Drugs      |          |
| 24 HR venlafaxine 150 MG Extended Release Oral Capsule                                                                                                                                                                                                          | 743717   | Antidepressant | Depression | Drugs      |          |
| 24 HR venlafaxine 37.5 MG Extended Release Oral Capsule                                                                                                                                                                                                         | 743719   | Antidepressant | Depression | Drugs      |          |
| duloxetine 60 MG Delayed Release Oral Capsule [Cymbalta]                                                                                                                                                                                                        | 715301   | Antidepressant | Depression | Drugs      |          |
| 12 HR bupropion hydrochloride 100 MG Extended Release Oral Tablet                                                                                                                                                                                               | 40221856 | Antidepressant | Depression | Drugs      |          |
| 12 HR bupropion hydrochloride 150 MG Extended Release Oral Tablet                                                                                                                                                                                               | 40221859 | Antidepressant | Depression | Drugs      |          |
| 24 HR bupropion hydrochloride 150 MG Extended Release Oral Tablet                                                                                                                                                                                               | 40221871 | Antidepressant | Depression | Drugs      |          |
| 24 HR bupropion hydrochloride 300 MG Extended Release Oral Tablet                                                                                                                                                                                               | 40221874 | Antidepressant | Depression | Drugs      |          |
| Recurrent major depressive episodes, moderate                                                                                                                                                                                                                   | 432883   | Depression     | Depression | Conditions | Excluded |
| Recurrent major depressive episodes                                                                                                                                                                                                                             | 432285   | Depression     | Depression | Conditions | Excluded |
| Recurrent major depression in partial remission                                                                                                                                                                                                                 | 4141454  | Depression     | Depression | Conditions | Excluded |
| Depressive disorder                                                                                                                                                                                                                                             | 440383   | Depression     | Depression | Conditions |          |
| Recurrent major depression in remission                                                                                                                                                                                                                         | 433991   | Depression     | Depression | Conditions | Excluded |
| Bipolar affective disorder, current episode depression                                                                                                                                                                                                          | 439254   | Depression     | Depression | Conditions | Excluded |
| Major depression, single episode                                                                                                                                                                                                                                | 4282096  | Depression     | Depression | Conditions | Excluded |
| Bipolar affective disorder, currently depressed, in full remission                                                                                                                                                                                              | 439251   | Depression     | Depression | Conditions | Excluded |

|                                                                                    |          |                       |            |            |          |
|------------------------------------------------------------------------------------|----------|-----------------------|------------|------------|----------|
| Bipolar affective disorder, currently depressed, moderate                          | 437528   | Depression            | Depression | Conditions |          |
| Schizoaffective disorder, depressive type                                          | 4224940  | Depression            | Depression | Conditions | Excluded |
| Dysthymia                                                                          | 433440   | Depression            | Depression | Conditions |          |
| Recurrent major depression in full remission                                       | 4263748  | Depression            | Depression | Conditions | Excluded |
| Single episode of major depression in full remission                               | 4025677  | Depression            | Depression | Conditions | Excluded |
| Recurrent major depressive episodes, severe, with psychosis                        | 434911   | Depression            | Depression | Conditions | Excluded |
| Chronic depression                                                                 | 4103574  | Depression            | Depression | Conditions |          |
| Severe depression                                                                  | 4149321  | Depression            | Depression | Conditions |          |
| Premenstrual dysphoric disorder                                                    | 4242733  | Depression            | Depression | Conditions | Excluded |
| Recurrent depression                                                               | 4098302  | Depression            | Depression | Conditions |          |
| Moderate major depression, single episode                                          | 4049623  | Depression            | Depression | Conditions | Excluded |
| Mild major depression, single episode                                              | 4195572  | Depression            | Depression | Conditions | Excluded |
| Mild recurrent major depression                                                    | 4228802  | Depression            | Depression | Conditions |          |
| Recurrent major depression                                                         | 4282316  | Depression            | Depression | Conditions |          |
| Positive screening for depression on PHQ-9 (Patient Health Questionnaire 9)        | 43021839 | Depression            | Depression | Conditions |          |
| Recurrent major depressive episodes, mild                                          | 438998   | Depression            | Depression | Conditions | Excluded |
| Severe major depression, single episode, with psychotic features                   | 438406   | Depression            | Depression | Conditions | Excluded |
| Severe major depression, single episode, without psychotic features                | 441534   | Depression            | Depression | Conditions | Excluded |
| Moderate recurrent major depression                                                | 4077577  | Depression            | Depression | Conditions |          |
| Bipolar affective disorder, currently depressed, mild                              | 439253   | Depression            | Depression | Conditions |          |
| Psychosis and severe depression co-occurrent and due to bipolar affective disorder | 35622934 | Depression            | Depression | Conditions |          |
| Severe recurrent major depression without psychotic features                       | 435220   | Depression            | Depression | Conditions |          |
| Mixed anxiety and depressive disorder                                              | 4338031  | Depression            | Depression | Conditions |          |
| Reactive depression (situational)                                                  | 4314692  | Depression            | Depression | Conditions | Excluded |
| Major depression single episode, in partial remission                              | 4323418  | Depression            | Depression | Conditions | Excluded |
| Major depressive disorder                                                          | 4152280  | Depression            | Depression | Conditions |          |
| Severe recurrent major depression with psychotic features                          | 4154309  | Depression            | Depression | Conditions |          |
| Major depression in partial remission                                              | 4148630  | Depression            | Depression | Conditions | Excluded |
| Major depression in remission                                                      | 4176002  | Depression            | Depression | Conditions | Excluded |
| Severe recurrent major depression                                                  | 43531624 | Depression            | Depression | Conditions |          |
| Single major depressive episode, severe, with psychosis                            | 439259   | Depression            | Depression | Conditions | Excluded |
| Atypical depressive disorder                                                       | 438727   | Depression            | Depression | Conditions | Excluded |
| Major depression with psychotic features                                           | 37111697 | Depression            | Depression | Conditions |          |
| Mild major depression                                                              | 4336957  | Depression            | Depression | Conditions |          |
| Reactive depressive psychosis                                                      | 435520   | Depression            | Depression | Conditions | Excluded |
| Major depression in full remission                                                 | 4269493  | Depression            | Depression | Conditions | Excluded |
| Depressive disorder in remission                                                   | 44782943 | Depression            | Depression | Conditions | Excluded |
| Moderate major depression                                                          | 4307111  | Depression            | Depression | Conditions |          |
| Menopausal depression                                                              | 4223090  | Depression            | Depression | Conditions |          |
| Severe major depression, single episode                                            | 42872411 | Depression            | Depression | Conditions | Excluded |
| Seasonal affective disorder                                                        | 4092239  | Depression            | Depression | Conditions | Excluded |
| Recurrent major depressive disorder with postpartum onset                          | 4324959  | Depression            | Depression | Conditions |          |
| Severe major depression with psychotic features, mood-congruent                    | 4144233  | Depression            | Depression | Conditions |          |
| Multi-infarct dementia with depression                                             | 443864   | Depression            | Depression | Conditions |          |
| Chronic depressive personality disorder                                            | 40481798 | Depression            | Depression | Conditions |          |
| Moderately severe recurrent major depression                                       | 36714998 | Depression            | Depression | Conditions |          |
| Depression screening positive                                                      | 762504   | Depression            | Depression | Conditions |          |
| Severe major depression with psychotic features                                    | 4250023  | Depression            | Depression | Conditions |          |
| Endogenous depression                                                              | 4114950  | Depression            | Depression | Conditions |          |
| Mild depression                                                                    | 4149320  | Depression            | Depression | Conditions |          |
| Acute depression                                                                   | 37016718 | Depression            | Depression | Conditions |          |
| Severe postnatal depression                                                        | 4129184  | Depression            | Depression | Conditions |          |
| Moderately severe major depression                                                 | 36714389 | Depression            | Depression | Conditions |          |
| Severe major depression                                                            | 42872722 | Depression            | Depression | Conditions |          |
| Recurrent major depressive disorder with melancholic features                      | 4205471  | Depression            | Depression | Conditions |          |
| Major depression, melancholic type                                                 | 4154391  | Depression            | Depression | Conditions |          |
| Severe major depression without psychotic features                                 | 4327337  | Depression            | Depression | Conditions |          |
| Moderate depression                                                                | 4151170  | Depression            | Depression | Conditions |          |
| Maternity blues                                                                    | 4133073  | Depression            | Depression | Conditions |          |
| Drug-induced depressive state                                                      | 4103126  | Depression            | Depression | Conditions |          |
| Chronic recurrent major depressive disorder                                        | 4094358  | Depression            | Depression | Conditions |          |
| Minimal major depression                                                           | 36715000 | Depression            | Depression | Conditions |          |
| O/E - depressed                                                                    | 4038252  | Depression            | Depression | Conditions |          |
| Recurrent severe major depressive disorder co-occurrent with anxiety               | 35615152 | Depression            | Depression | Conditions |          |
| Moderately severe depression                                                       | 36717092 | Depression            | Depression | Conditions |          |
| Recurrent moderate major depressive disorder co-occurrent with anxiety             | 35615153 | Depression            | Depression | Conditions |          |
| Chronic major depressive disorder, single episode                                  | 4031328  | Depression            | Depression | Conditions | Excluded |
| Minimal depression                                                                 | 36713698 | Depression            | Depression | Conditions |          |
| Depressive disorder in mother complicating pregnancy                               | 37018656 | Depression            | Depression | Conditions |          |
| Secondary dysthymia                                                                | 4224639  | Depression            | Depression | Conditions |          |
| Recurrent major depressive disorder in partial remission co-occurrent with anxiety | 35615155 | Depression            | Depression | Conditions | Excluded |
| Postpartum depression                                                              | 4239471  | Postpartum depression | Depression | Conditions |          |
